# Supplementary material
Source: PubMed Central journal article supplement (PMC2901138)
Supplement: ddq201_1.pdf [file ddq201_1.pdf]

## **Supplemental Materials**

1. Supplemental Methods.
2. Supplemental Table 1 (Description of cerebellum samples).
3. Supplemental Table 2 (RT-PCR results of 33 exons with validated splicing differences between human, chimpanzee and rhesus cerebellums).
4. Supplemental Table 3 (The rankings of RT-PCR confirmed splicing differences between human and chimpanzee or human and rhesus cerebellums among all events predicted by HJAY).
5. Supplemental Table 4 (Cassette exons predicted by the HJAY array to have splicing differences between human and chimpanzee cerebellums).
6. Supplemental Table 5 (Cassette exons predicted by the HJAY array to have splicing differences between human and rhesus cerebellums).
7. Supplemental Table 6 (List of RT-PCR primers).
8. Supplemental Figure 1 (Gene expression levels of 509 genes with identified splicing differences between human and chimpanzee/rhesus cerebellums in a panel of 9 human tissues). The expression level of each gene in a tissue was calculated from RNA-Seq data as the RPKM value (reads per kilobase of exon model per million mapped reads) within its constitutive exons.
9. Supplemental Figure 2 (RT-PCR analysis of 10 exons in multiple tissues of human, chimpanzee and rhesus macaque). Ce: cerebellum. K: kidney. L: liver. M: muscle. Hs: human. Pt: chimpanzee. Rm: rhesus macaque.

## **Supplemental Methods**

### **Identification of HJAY array probes perfectly matching exons or exon-exon junctions of orthologous human, chimpanzee and rhesus mRNA transcripts**

For every HJAY probe, we obtained the genomic coordinate of its target sequence on the hg18 assembly of the human genome according to Affymetrix's probe annotations. Using the UCSC pairwise genome alignments of the human genome (hg18) to the genomes of chimpanzee (panTro2) and rhesus macaque (rheMac2) (1-2), we identified all HJAY probes that perfectly matched orthologous transcripts from chimpanzees or rhesus macaques. Next, for each HJAY probeset (typically consisting of 8 probes), we removed probes that contained mismatches for their orthologous transcripts. We defined a probeset as having sufficient coverage for chimpanzee or rhesus transcripts, if it had  $\geq 3$  probes that perfectly matched its orthologous transcripts. Finally, we sought to identify alternative splicing events with sufficient probeset coverage for human-versus-chimpanzee or human-versus-rhesus comparisons of splicing patterns. The HJAY array was designed for a total of 20815 mRNA/EST-supported alternative splicing events in human genes. For each alternative splicing event, every possible mRNA isoform product was targeted by one or multiple HJAY probesets. For example, each exon skipping event was interrogated by four probesets: one "skip" probeset targeting the exon skipping junction of the exon skipping isoform, and three "include" probesets targeting the upstream exon junction, the cassette exon, and the downstream exon junction of the exon inclusion isoform (3). We defined an alternative splicing event as having sufficient probeset coverage for the human-versus-chimpanzee or human-versus-rhesus comparison, if every possible mRNA isoform had at least one probeset containing  $\geq 3$  perfect-match probes for orthologous chimpanzee or rhesus transcripts. Based on this criterion, we collected 15544 alternative splicing events for the human-versus-chimpanzee comparison (10630 exon skipping events, 3835 alternative splice site selection, and 1079 mutually exclusive exon usage), and 10147 events for the human-versus-rhesus comparison (6842 exon skipping events, 2467 alternative splice site selection, and 838 mutually exclusive exon usage).

### **Identification of differential splicing events between human, chimpanzee and rhesus cerebellum RNAs**

We developed a series of statistical methods for detection of differential splicing events from the Affymetrix HJAY array data (3-8). In this work, these methods were applied to HJAY array data of human, chimpanzee and rhesus tissues after minor modifications (see details below).

Specifically, we used microarray signals of HJAY probes perfectly matching orthologous transcripts to identify differential splicing events between humans and chimpanzees or humans and rhesus macaques. An overview of our HJAY array data analysis is provided below.

**Background correction:** Raw HJAY array CEL files were processed by the ProbeEffects program for background correction and normalization (5). We predicted the background intensities of individual HJAY probes, using a sequence-specific linear model trained from ‘anti-genomic’ background probes on the HJAY array (5). These ‘anti-genomic’ background probes were selected by Affymetrix to avoid a broad range of animal, plant and bacterial genomes (see [http://www.affymetrix.com/support/technical/datasheets/exon\\_arraydesign\\_datasheet.pdf](http://www.affymetrix.com/support/technical/datasheets/exon_arraydesign_datasheet.pdf)). For every probe, the predicted background intensity was an estimate for the amount of non-specific hybridization to the probe. This background intensity was subtracted from the observed probe intensity before downstream analysis.

**Expression Index Calculation:** We calculated gene expression indexes of human, chimpanzee and rhesus tissues, using HJAY exon probes that perfectly matched orthologous transcripts from multiple species as described before (9). For the human-versus-chimpanzee analysis, for each gene we started with all exon probes that uniquely and perfectly matched orthologous transcripts from human and chimpanzee genomes. From these probes, we used a correlation-based iterative probe selection algorithm to select a subset of probes with highly correlated intensities across all samples (7). This probe selection algorithm was developed to remove probes that may not reflect overall gene expression levels, such as probes targeting alternative exons or putative exon predictions, as well as low-affinity or cross-hybridizing probes (7). Our previous studies show that this probe selection algorithm produces robust expression indexes (5-6, 10). The selected probes were regarded as reliable indicators of overall gene expression levels. In genes with  $\geq 6$  selected probes, the background-corrected intensities of selected probes were fitted to the Li-Wong model (11) as in (5, 7) to construct robust estimates of gene expression indexes. The same procedure was applied to human and rhesus HJAY array data in the human-versus-rhesus analysis.

Identification of differential splicing events between human and chimpanzee or human and rhesus cerebellums: We used a modified version of the MADS+ algorithm (3, 8) to identify differential splicing events between human and chimpanzee or human and rhesus cerebellums. MADS+ was an algorithm we developed for detecting differential splicing events from the Affymetrix HJAY array data. Briefly, for each probe in a particular sample, MADS+ calculate a “splicing index”, represented as the background corrected probe intensity divided by the estimated gene expression index. Two separate one-sided t-tests are performed to test if the splicing index of a probe is substantially higher in one sample group over the other group. Next, the p-values of individual probes of a probeset are summarized using Fisher’s method to obtain a probeset-level p-value for differential splicing (8). Finally, MADS+ reads pre-compiled annotation files of alternative splicing events queried by the HJAY array. For each alternative splicing event, MADS+ evaluates the p-values of multiple probesets targeting exons and exon-exon junctions, requiring opposite trends for probesets targeting competing isoforms as evidence of differential splicing. For example, for each exon skipping event, MADS+ requires that the “skip” probeset and at least one of the three “include” probesets have p-values below a pre-defined significance cutoff (0.01 in this study), and that significant “include” and “skip” probesets display opposite directions of change in splicing index between the two sample groups. It should be noted that the MADS+ algorithm has been demonstrated to have a high accuracy in detecting differential splicing events in a series of previous studies (3, 8, 12).

In this work, we modified the original MADS+ algorithm for comparative analysis of splicing patterns between humans and nonhuman primates. We used MADS+ in two separate pairwise comparisons (human-versus-chimpanzee and human-versus-rhesus). In each pairwise comparison, several default filters were applied prior to the MADS+ analysis. Specifically, we removed lowly expressed genes whose average gene expression indexes were below a given cutoff (300 in this study) in any of the two species included in a pairwise comparison. We also removed genes with a substantial fold change (2.0 in this study) in gene expression indexes between species. Finally, individual probes with low intensities (50 in this study) in both species or extremely high intensities (higher than 95% quantile of all exon probes of the same gene) were also removed to ensure robust estimates of splicing indexes. Subsequent to these filtering steps, an alternative splicing event was included in the human-

versus-chimpanzee or human-versus-rhesus comparison, if every possible mRNA isoform produced by the alternative splicing event had at least one probeset containing  $\geq 3$  perfect-match probes for orthologous chimpanzee or rhesus transcripts. For these events, MADS+ was applied to exon probes and exon-exon junction probes that perfectly matched orthologous transcripts to identify candidate differential splicing events between species.

### **Ranking of cassette exons with HJAY predicted splicing differences between human and chimpanzee or human and rhesus cerebellums**

For each cassette exon predicted by the HJAY analysis as having splicing differences between human and chimpanzee cerebellums, we calculated a single combined p-value for the overall statistical significance of splicing differences, by summarizing the individual p-values of all available perfect-match probes targeting orthologous exons and exon-exon junctions of the human and chimpanzee transcripts. The combined p-value was calculated using the Fisher's method as described before (8). The resulting p-values were used to rank all exons. The same approach was used to rank cassette exon predicted by the HJAY analysis as having splicing differences between human and rhesus cerebellums.

### **References**

- 1 Kuhn, R.M., Karolchik, D., Zweig, A.S., Wang, T., Smith, K.E., Rosenbloom, K.R., Rhead, B., Raney, B.J., Pohl, A., Pheasant, M. *et al.* (2009) The UCSC Genome Browser Database: update 2009. *Nucleic Acids Res.*, **37**, D755-761.
- 2 Miller, W., Rosenbloom, K., Hardison, R.C., Hou, M., Taylor, J., Raney, B., Burhans, R., King, D.C., Baertsch, R., Blankenberg, D. *et al.* (2007) 28-way vertebrate alignment and conservation track in the UCSC Genome Browser. *Genome Res.*, **17**, 1797-1808.
- 3 Shen, S., Warzecha, C.C., Carstens, R.P. and Xing, Y. (2010) MADS+: discovery of differential splicing events from Affymetrix exon junction array data. *Bioinformatics*, **26**, 268-269.
- 4 Kapur, K., Jiang, H., Xing, Y. and Wong, W.H. (2008) Cross-hybridization modeling on Affymetrix exon arrays. *Bioinformatics*, **24**, 2887-2893.
- 5 Kapur, K., Xing, Y., Ouyang, Z. and Wong, W.H. (2007) Exon arrays provide accurate assessments of gene expression. *Genome Biol.*, **8**, R82.
- 6 Lin, L., Liu, S., Brockway, H., Seok, J., Jiang, P., Wong, W.H. and Xing, Y. (2009) Using high-density exon arrays to profile gene expression in closely related species. *Nucleic Acids Res.*, **37**, e90.
- 7 Xing, Y., Kapur, K. and Wong, W.H. (2006) Probe selection and expression index computation of affymetrix exon arrays. *PLoS ONE*, **1**, e88.

- 8 Xing, Y., Stoilov, P., Kapur, K., Han, A., Jiang, H., Shen, S., Black, D.L. and Wong, W.H. (2008) MADS: a new and improved method for analysis of differential alternative splicing by exon-tiling microarrays. *RNA*, **14**, 1470-1479.
- 9 Lin, L., Jiang, P., Shen, S., Sato, S., Davidson, B.L. and Xing, Y. (2009) Large-scale analysis of exonized mammalian-wide interspersed repeats in primate genomes. *Hum. Mol. Genet.*, **18**, 2204-2214.
- 10 Chiao, E., Elazar, M., Xing, Y., Xiong, A., Kmet, M., Millan, M.T., Glenn, J.S., Wong, W.H. and Baker, J. (2008) Isolation and transcriptional profiling of purified hepatic cells derived from human embryonic stem cells. *Stem Cells*, **26**, 2032-2041.
- 11 Li, C. and Wong, W.H. (2001) Model-based analysis of oligonucleotide arrays: expression index computation and outlier detection. *Proc. Natl. Acad. Sci. U S A*, **98**, 31-36.
- 12 Warzecha, C.C., Shen, S., Xing, Y. and Carstens, R.P. (2009) The epithelial splicing factors ESRP1 and ESRP2 positively and negatively regulate diverse types of alternative splicing events. *RNA Biol*, **6**, 546-562.

**Supplemental Table 1.** Description of cerebellum samples.

| <b>Sample ID</b> | <b>Species</b> | <b>HJAY</b> | <b>RT-PCR</b> | <b>Description of Donor(s)</b>    |
|------------------|----------------|-------------|---------------|-----------------------------------|
| Clontech-1       | Human          | X           | X             | Male/Female, 24 donors, age 16-70 |
| Clontech-2       | Human          | X           | X             | Male/Female, 10 donors, age 22-68 |
| Ambion           | Human          |             | X             | Female, single donor, age 59      |
| BioChain         | Human          |             | X             | Male, single donor, age 26        |
| 069              | Chimpanzee     | X           | X             | Male, age 30                      |
| 100              | Chimpanzee     | X           | X             | Female, age 27                    |
| 123              | Chimpanzee     | X           | X             | Female, age 28                    |
| 230              | Chimpanzee     |             | X             | Female, age 42                    |
| 327              | Chimpanzee     | X           | X             | Male, age 37                      |
| 355              | Chimpanzee     | X           | X             | Female, age 17                    |
| 487              | Chimpanzee     | X           | X             | Male, age 30                      |
| 507              | Chimpanzee     |             | X             | Male, age 31                      |
| 12805            | Rhesus Macaque | X           | X             | Male, age 11                      |
| 14453            | Rhesus Macaque | X           | X             | Female, age 11                    |
| 14759            | Rhesus Macaque | X           | X             | Male, age 8                       |
| 14775            | Rhesus Macaque | X           | X             | Female, age 8                     |
| 17504            | Rhesus Macaque |             | X             | Female, age 24                    |
| 17520            | Rhesus Macaque | X           | X             | Female, age 18                    |
| 17528            | Rhesus Macaque |             | X             | Female, age 18                    |
| 17533            | Rhesus Macaque | X           | X             | Female, age 18                    |

**Supplemental Table 2:** RT-PCR results of 33 exons with validated splicing differences between human, chimpanzee and rhesus cerebellums.

|                               |                                                                                                                      |                                                                                                                                                                                                                                                                                          |
|-------------------------------|----------------------------------------------------------------------------------------------------------------------|------------------------------------------------------------------------------------------------------------------------------------------------------------------------------------------------------------------------------------------------------------------------------------------|
| <b>Gene Symbol</b>            | MAGOH                                                                                                                | <b>MAGOH</b><br><p>Clontech-1<br/>Clontech-2<br/>Ambion<br/>BioChain</p> <p>Hs: 069, 100, 123, 230, 327, 355, 487, 507</p> <p>Pt: 12805, 14453, 14759, 14775, 17520, 17528, 17533, 17504</p> <p>Rm: 12805, 14453, 14759, 14775, 17520, 17528, 17533, 17504</p>                           |
| <b>Exon genome coordinate</b> | -chr1:53471801-53471912                                                                                              |                                                                                                                                                                                                                                                                                          |
| <b>Full Name</b>              | Mago-nashi homolog, proliferation-associated (Drosophila)                                                            |                                                                                                                                                                                                                                                                                          |
| <b>Exon inclusion level</b>   | Human<<chimpanzee/rhesus                                                                                             |                                                                                                                                                                                                                                                                                          |
| <b>Notes</b>                  | Human specific skipping of exon 3 (coding region)                                                                    |                                                                                                                                                                                                                                                                                          |
| <b>Gene Symbol</b>            | PIGX                                                                                                                 | <b>PIGX (chr3:197937922-197938039)</b><br><p>Clontech-1<br/>Clontech-2<br/>Ambion<br/>BioChain</p> <p>Hs: 069, 100, 123, 230, 327, 355, 487, 507</p> <p>Pt: 12805, 14453, 14759, 14775, 17520, 17528, 17533, 17504</p> <p>Rm: 12805, 14453, 14759, 14775, 17520, 17528, 17533, 17504</p> |
| <b>Exon genome coordinate</b> | + chr3:197937922-197938039                                                                                           |                                                                                                                                                                                                                                                                                          |
| <b>Full Name</b>              | Phosphatidylinositol glycan anchor biosynthesis, class X                                                             |                                                                                                                                                                                                                                                                                          |
| <b>Exon inclusion level</b>   | Human>>chimpanzee/rhesus                                                                                             |                                                                                                                                                                                                                                                                                          |
| <b>Notes</b>                  | Human specific inclusion between exon 3 and 4, introducing premature termination codon and NMD                       |                                                                                                                                                                                                                                                                                          |
| <b>Gene Symbol</b>            | ZDHHC13/HIP14L                                                                                                       | <b>ZDHHC13/HIP14L</b><br><p>Clontech-1<br/>Clontech-2<br/>Ambion<br/>BioChain</p> <p>Hs: 069, 100, 123, 230, 327, 355, 487, 507</p> <p>Pt: 12805, 14453, 14759, 14775, 17520, 17528, 17533, 17504</p> <p>Rm: 12805, 14453, 14759, 14775, 17520, 17528, 17533, 17504</p>                  |
| <b>Exon genome coordinate</b> | +chr11:19121105-19121246                                                                                             |                                                                                                                                                                                                                                                                                          |
| <b>Full Name</b>              | zinc finger, DHHC-type containing 13, Huntingtin-interacting protein 14 -related protein                             |                                                                                                                                                                                                                                                                                          |
| <b>Exon inclusion level</b>   | Human<<chimpanzee/rhesus                                                                                             |                                                                                                                                                                                                                                                                                          |
| <b>Notes</b>                  | Human specific increase in skipping of exon 2, which causes usage of a downstream translational start site on exon 5 |                                                                                                                                                                                                                                                                                          |



|                               |                                                            |                                                                                                                                                                                                            |
|-------------------------------|------------------------------------------------------------|------------------------------------------------------------------------------------------------------------------------------------------------------------------------------------------------------------|
| <b>Gene Symbol</b>            | LPHN3/CIRL3                                                | <b>LPHN3/CIRL3</b><br><p>Clontech-1<br/>Clontech-2<br/>Ambion<br/>BioChain</p> <p>Hs</p> <p>069 100 123 230 327 355 487 507</p> <p>Pt</p> <p>12805 14453 14759 14775 17520 17528 17533 17504</p> <p>Rm</p> |
| <b>Exon genome coordinate</b> | +chr4:62461031-62461070                                    |                                                                                                                                                                                                            |
| <b>Full Name</b>              | LPHN3 latrophilin 3                                        |                                                                                                                                                                                                            |
| <b>Exon inclusion level</b>   | Human<<chimpanzee/rhesus                                   |                                                                                                                                                                                                            |
| <b>Notes</b>                  | Human specific increase in exon 4 skipping (coding region) |                                                                                                                                                                                                            |

|                               |                                                             |                                                                                                                                                                                                               |
|-------------------------------|-------------------------------------------------------------|---------------------------------------------------------------------------------------------------------------------------------------------------------------------------------------------------------------|
| <b>Gene Symbol</b>            | NUPL1/KIAA0410                                              | <b>NUPL1/KIAA0410</b><br><p>Clontech-1<br/>Clontech-2<br/>Ambion<br/>BioChain</p> <p>Hs</p> <p>069 100 123 230 327 355 487 507</p> <p>Pt</p> <p>12805 14453 14759 14775 17520 17528 17533 17504</p> <p>Rm</p> |
| <b>Exon genome coordinate</b> | +chr13:24781384-24781420                                    |                                                                                                                                                                                                               |
| <b>Full Name</b>              | Nucleoporin like 1                                          |                                                                                                                                                                                                               |
| <b>Exon inclusion level</b>   | Human>>chimpanzee/rhesus                                    |                                                                                                                                                                                                               |
| <b>Notes</b>                  | Human specific increase in exon 3 inclusion (coding region) |                                                                                                                                                                                                               |

|                               |                                                     |                                                                                                                                                                                                      |
|-------------------------------|-----------------------------------------------------|------------------------------------------------------------------------------------------------------------------------------------------------------------------------------------------------------|
| <b>Gene Symbol</b>            | DDX42                                               | <b>DDX42</b><br><p>Clontech-1<br/>Clontech-2<br/>Ambion<br/>BioChain</p> <p>Hs</p> <p>069 100 123 230 327 355 487 507</p> <p>Pt</p> <p>12805 14453 14759 14775 17520 17528 17533 17504</p> <p>Rm</p> |
| <b>Exon genome coordinate</b> | +chr17:59206199-59206270                            |                                                                                                                                                                                                      |
| <b>Full Name</b>              | DEAD (Asp-Glu-Ala-Asp) box polypeptide 42           |                                                                                                                                                                                                      |
| <b>Exon inclusion level</b>   | Human>chimpanzee>rhesus                             |                                                                                                                                                                                                      |
| <b>Notes</b>                  | Human specific increase in exon 2 inclusion (5'UTR) |                                                                                                                                                                                                      |

|                               |                                                                                                                                      |                               |
|-------------------------------|--------------------------------------------------------------------------------------------------------------------------------------|-------------------------------|
| <b>Gene Symbol</b>            | DCAF11/WDR23/GL014                                                                                                                   | <b>DCAF11/WDR23/GL014</b><br> |
| <b>Exon genome coordinate</b> | +chr14:23656716-23656781                                                                                                             |                               |
| <b>Full Name</b>              | DDB1 and CUL4 associated factor 11                                                                                                   |                               |
| <b>Exon inclusion level</b>   | Human/chimpanzee>>rhesus                                                                                                             |                               |
| <b>Notes</b>                  | Human and chimpanzee showed increased exon 5 inclusion when compared to rhesus (coding region, alternative N-terminal reading frame) |                               |

|                               |                                                                                                                                                                                     |                   |
|-------------------------------|-------------------------------------------------------------------------------------------------------------------------------------------------------------------------------------|-------------------|
| <b>Gene Symbol</b>            | AMOTL1                                                                                                                                                                              | <b>AMOTL1</b><br> |
| <b>Exon genome coordinate</b> | +chr11:94167824-94167974                                                                                                                                                            |                   |
| <b>Full Name</b>              | Angiomotin like 1                                                                                                                                                                   |                   |
| <b>Exon inclusion level</b>   | Rhesus>>human>chimpanzee                                                                                                                                                            |                   |
| <b>Notes</b>                  | Rhesus showed increased exon 2 (coding region) inclusion when compared to human/chimpanzee. Exon 2 skipping results in the absence of three threonine/serine phosphorylation sites. |                   |

|                               |                                                                                                                                                                                                                   |                   |
|-------------------------------|-------------------------------------------------------------------------------------------------------------------------------------------------------------------------------------------------------------------|-------------------|
| <b>Gene Symbol</b>            | ZFAND1                                                                                                                                                                                                            | <b>ZFAND1</b><br> |
| <b>Exon genome coordinate</b> | -chr8:82792039-82792078                                                                                                                                                                                           |                   |
| <b>Full Name</b>              | Zinc finger, AN1-type domain 1                                                                                                                                                                                    |                   |
| <b>Exon inclusion level</b>   | Chimpanzee>>human/rhesus                                                                                                                                                                                          |                   |
| <b>Notes</b>                  | Chimpanzee showed increased inclusion of exon 3 when compared to human/rhesus. Skipping of exon 3 moves the translation start site to exon 5 and produces a truncated protein missing the two zinc finger motifs. |                   |

|                               |                                                                                                             |                    |
|-------------------------------|-------------------------------------------------------------------------------------------------------------|--------------------|
| <b>Gene Symbol</b>            | GPBP1L1                                                                                                     | <b>GPBP1L1</b><br> |
| <b>Exon genome coordinate</b> | -chr1:45923835-45923879                                                                                     |                    |
| <b>Full Name</b>              | GC-rich promoter binding protein 1-like 1                                                                   |                    |
| <b>Exon inclusion level</b>   | Human/chimpanzee>>rhesus                                                                                    |                    |
| <b>Notes</b>                  | Human/chimpanzee specific inclusion of exon 2 (5'UTR) when compared to rhesus. Rhesus lacks 3' splice site. |                    |

|                               |                                                                                                   |                       |
|-------------------------------|---------------------------------------------------------------------------------------------------|-----------------------|
| <b>Gene Symbol</b>            | LMBR1/ACHP                                                                                        | <b>LMBR1/ACHP</b><br> |
| <b>Exon genome coordinate</b> | -chr7:156173484-156173646                                                                         |                       |
| <b>Full Name</b>              | limb region 1 homolog (mouse)                                                                     |                       |
| <b>Exon inclusion level</b>   | Human/chimpanzee<<rhesus                                                                          |                       |
| <b>Notes</b>                  | Human/chimpanzee specific increase in skipping of exon 16 (coding region) when compared to rhesus |                       |

|                               |                                                                                                                                        |                                            |
|-------------------------------|----------------------------------------------------------------------------------------------------------------------------------------|--------------------------------------------|
| <b>Gene Symbol</b>            | PIGX                                                                                                                                   | <b>PIGX (chr3:197939969-197940023)</b><br> |
| <b>Exon genome coordinate</b> | +chr3:197939969-197940023                                                                                                              |                                            |
| <b>Full Name</b>              | Phosphatidylinositol glycan anchor biosynthesis, class X                                                                               |                                            |
| <b>Exon inclusion level</b>   | Human>>chimpanzee                                                                                                                      |                                            |
| <b>Notes</b>                  | Human specific inclusion of exon 5 (coding region) when compared to chimpanzee. Rhesus genomic sequence unavailable for primer design. |                                            |

|                               |                                                                                                                                                          |                     |
|-------------------------------|----------------------------------------------------------------------------------------------------------------------------------------------------------|---------------------|
| <b>Gene Symbol</b>            | C11orf80                                                                                                                                                 | <b>C11orf80</b><br> |
| <b>Exon genome coordinate</b> | +chr11:66346610-66346721                                                                                                                                 |                     |
| <b>Full Name</b>              | Chromosome 11 open reading frame 80                                                                                                                      |                     |
| <b>Exon inclusion level</b>   | Human >>chimpanzee                                                                                                                                       |                     |
| <b>Notes</b>                  | Human specific increase in exon 2 (37aa in coding region) inclusion where compared to chimpanzee. Rhesus genomic sequence unavailable for primer design. |                     |

|                               |                                                                                                 |                          |
|-------------------------------|-------------------------------------------------------------------------------------------------|--------------------------|
| <b>Gene Symbol</b>            | SYNRG/AP1GBP1                                                                                   | <b>SYNRG/AP1GBP1</b><br> |
| <b>Exon genome coordinate</b> | -chr17:32954395-32954430                                                                        |                          |
| <b>Full Name</b>              | Synergyn, gamma                                                                                 |                          |
| <b>Exon inclusion level</b>   | Human/chimpanzee>rhesus                                                                         |                          |
| <b>Notes</b>                  | Human/chimpanzee specific increase in exon 22 (coding region) inclusion when compared to rhesus |                          |

|                               |                                                                                                                                                   |                        |
|-------------------------------|---------------------------------------------------------------------------------------------------------------------------------------------------|------------------------|
| <b>Gene Symbol</b>            | KCNJ3/GIRK1                                                                                                                                       | <b>KCNJ3/GIRK1</b><br> |
| <b>Exon genome coordinate</b> | +chr2:155274360-155274577                                                                                                                         |                        |
| <b>Full Name</b>              | Potassium inwardly-rectifying channel, subfamily J, member 3                                                                                      |                        |
| <b>Exon inclusion level</b>   | Human<chimpanzee/rhesus                                                                                                                           |                        |
| <b>Notes</b>                  | Human specific decrease in exon 2 inclusion (coding region) when compared to chimpanzee/rhesus (with several individual outliers in chimpanzees). |                        |

|                               |                                                                               |                                                                                                                                                                                 |
|-------------------------------|-------------------------------------------------------------------------------|---------------------------------------------------------------------------------------------------------------------------------------------------------------------------------|
| <b>Gene Symbol</b>            | CAMTA1                                                                        | <p><b>CAMTA1</b></p> <p>Clontech-1 Clontech-2 Ambion BioChain</p> <p>Hs 069 100 123 230 327 355 487 507</p> <p>Pt 12805 14453 14759 14775 17520 17528 17533 17504</p> <p>Rm</p> |
| <b>Exon genome coordinate</b> | +chr1:7738284-7738315                                                         |                                                                                                                                                                                 |
| <b>Full Name</b>              | Calmodulin binding transcription activator 1                                  |                                                                                                                                                                                 |
| <b>Exon inclusion level</b>   | Human<chimpanzee <rhesus                                                      |                                                                                                                                                                                 |
| <b>Notes</b>                  | Skipping of exon 22 (coding region) results in alternative protein C-terminus |                                                                                                                                                                                 |

|                               |                                                                                                                                                                                 |                                                                                                                                                                                 |
|-------------------------------|---------------------------------------------------------------------------------------------------------------------------------------------------------------------------------|---------------------------------------------------------------------------------------------------------------------------------------------------------------------------------|
| <b>Gene Symbol</b>            | ZNF207                                                                                                                                                                          | <p><b>ZNF207</b></p> <p>Clontech-1 Clontech-2 Ambion BioChain</p> <p>Hs 069 100 123 230 327 355 487 507</p> <p>Pt 12805 14453 14759 14775 17520 17528 17533 17504</p> <p>Rm</p> |
| <b>Exon genome coordinate</b> | +chr17:27712599-27712647                                                                                                                                                        |                                                                                                                                                                                 |
| <b>Full Name</b>              | Zinc finger protein 207                                                                                                                                                         |                                                                                                                                                                                 |
| <b>Exon inclusion level</b>   | Human>rhesus                                                                                                                                                                    |                                                                                                                                                                                 |
| <b>Notes</b>                  | Rhesus specific decrease in exon 6 (coding region) inclusions when compared to human (with individual outliers). Exon 6 inclusion levels in chimpanzees vary among individuals. |                                                                                                                                                                                 |

|                               |                                                                                                                                                               |                                                                                                                                                                                                                                                               |
|-------------------------------|---------------------------------------------------------------------------------------------------------------------------------------------------------------|---------------------------------------------------------------------------------------------------------------------------------------------------------------------------------------------------------------------------------------------------------------|
| <b>Gene Symbol</b>            | NAV2                                                                                                                                                          | <p><b>NAV2</b></p> <p>Clontech-1 Clontech-2 Ambion BioChain</p> <p>Hs 54 54 39 58 %</p> <p>Pt 069 100 123 230 327 355 487 507</p> <p>38 29 40 41 39 41 34 33 %</p> <p>Rm 12805 14453 14759 14775 17520 17528 17533 17504</p> <p>38 48 56 48 37 46 49 39 %</p> |
| <b>Exon genome coordinate</b> | +chr11:19862415-19862484                                                                                                                                      |                                                                                                                                                                                                                                                               |
| <b>Full Name</b>              | Neuron navigator 2                                                                                                                                            |                                                                                                                                                                                                                                                               |
| <b>Exon inclusion level</b>   | Human>chimpanzee/rhesus                                                                                                                                       |                                                                                                                                                                                                                                                               |
| <b>Notes</b>                  | Human specific increase in the target exon (23aa insertion between exon 6 and 7) inclusion when compared to chimpanzee and rhesus (with individual outliers). |                                                                                                                                                                                                                                                               |

|                               |                                                                                                                                                                 |                           |
|-------------------------------|-----------------------------------------------------------------------------------------------------------------------------------------------------------------|---------------------------|
| <b>Gene Symbol</b>            | CAPRIN2/C1QDC1                                                                                                                                                  | <b>CAPRIN2/C1QDC1</b><br> |
| <b>Exon genome coordinate</b> | -chr12:30777829-30777912                                                                                                                                        |                           |
| <b>Full Name</b>              | Caprin family member 2                                                                                                                                          |                           |
| <b>Exon inclusion level</b>   | Human/chimpanzee<rhesus                                                                                                                                         |                           |
| <b>Notes</b>                  | Human/chimpanzee show decreased exon 5 inclusion level when compared to rhesus. Transcripts with exon 5 skipping use an alternative translation start on exon 6 |                           |

|                               |                                                                                                  |                    |
|-------------------------------|--------------------------------------------------------------------------------------------------|--------------------|
| <b>Gene Symbol</b>            | SIPA1L1/DKFZp686G1344                                                                            | <b>SIPA1L1</b><br> |
| <b>Exon genome coordinate</b> | +chr14:71241190-71241253                                                                         |                    |
| <b>Full Name</b>              | Signal-induced proliferation-associated 1 like                                                   |                    |
| <b>Exon inclusion level</b>   | Human/chimpanzee<rhesus                                                                          |                    |
| <b>Notes</b>                  | Human/chimpanzee show decreased exon 13 (coding region) inclusion level when compared to rhesus. |                    |

|                               |                                                                                                  |                 |
|-------------------------------|--------------------------------------------------------------------------------------------------|-----------------|
| <b>Gene Symbol</b>            | SOS1                                                                                             | <b>SOS1</b><br> |
| <b>Exon genome coordinate</b> | -chr2:39069914-39069959                                                                          |                 |
| <b>Full Name</b>              | Son of sevenless homolog 1                                                                       |                 |
| <b>Exon inclusion level</b>   | Human/chimpanzee>rhesus                                                                          |                 |
| <b>Notes</b>                  | Human/chimpanzee show increased exon 21 (coding region) inclusion level when compared to rhesus. |                 |

|                               |                                                                                                                                                  |  |
|-------------------------------|--------------------------------------------------------------------------------------------------------------------------------------------------|--|
| <b>Gene Symbol</b>            | GSTM3                                                                                                                                            |  |
| <b>Exon genome coordinate</b> | -chr1:110083977-110084053                                                                                                                        |  |
| <b>Full Name</b>              | Glutathione S-transferase mu 3 (brain)                                                                                                           |  |
| <b>Exon inclusion level</b>   | Human<chimpanzee/rhesus                                                                                                                          |  |
| <b>Notes</b>                  | Human specific skipping of exon 2 results in alternative translational start site and alternative reading frame, thus an alternative N-terminus. |  |

|                               |                                                            |  |
|-------------------------------|------------------------------------------------------------|--|
| <b>Gene Symbol</b>            | ACSL3                                                      |  |
| <b>Exon genome coordinate</b> | +chr2:223473635-223473742                                  |  |
| <b>Full Name</b>              | Acyl-CoA synthetase long-chain family member 3             |  |
| <b>Exon inclusion level</b>   | Human>chimpanzee/rhesus                                    |  |
| <b>Notes</b>                  | Human specific increase in exon 3 (5' UTR) inclusion level |  |

|                               |                                                                                                                          |  |
|-------------------------------|--------------------------------------------------------------------------------------------------------------------------|--|
| <b>Gene Symbol</b>            | GLS                                                                                                                      |  |
| <b>Exon genome coordinate</b> | +chr2:191527725-191527789                                                                                                |  |
| <b>Full Name</b>              | Glutaminase                                                                                                              |  |
| <b>Exon inclusion level</b>   | Human<chimpanzee/rhesus                                                                                                  |  |
| <b>Notes</b>                  | Human specific decrease in exon 17 inclusion level (coding region, skipping form results in alternative 65aa c-terminus) |  |

|                               |                                                                                                                                        |                   |
|-------------------------------|----------------------------------------------------------------------------------------------------------------------------------------|-------------------|
| <b>Gene Symbol</b>            | PTPRZ1                                                                                                                                 | <b>PTPRZ1</b><br> |
| <b>Exon genome coordinate</b> | +chr7:121474963-121475080                                                                                                              |                   |
| <b>Full Name</b>              | Protein tyrosine phosphatase, receptor-type, Z polypeptide 1                                                                           |                   |
| <b>Exon inclusion level</b>   | Human>chimpanzee/rhesus                                                                                                                |                   |
| <b>Notes</b>                  | Human specific 117nt exon inclusion between exon 23 and 24 (coding region, 39aa insertion). Human specific creation of 5' splice site. |                   |

|                               |                                                                                                         |                            |
|-------------------------------|---------------------------------------------------------------------------------------------------------|----------------------------|
| <b>Gene Symbol</b>            | DCLK1 (DCAMKL1)                                                                                         | <b>DCLK1 (DCAMKL1)</b><br> |
| <b>Exon genome coordinate</b> | -chr13:35260348-35260422                                                                                |                            |
| <b>Full Name</b>              | Doublecortin-like kinase 1                                                                              |                            |
| <b>Exon inclusion level</b>   | Human<rhesus                                                                                            |                            |
| <b>Notes</b>                  | Human specific decrease in exon 19 inclusion level compared to rhesus (coding, alternative c-terminus). |                            |

|                               |                                                                                                                                                       |                   |
|-------------------------------|-------------------------------------------------------------------------------------------------------------------------------------------------------|-------------------|
| <b>Gene Symbol</b>            | ASRGL1                                                                                                                                                | <b>ASRGL1</b><br> |
| <b>Exon genome coordinate</b> | +chr11:61880372-61880515                                                                                                                              |                   |
| <b>Full Name</b>              | Asparaginase-like 1                                                                                                                                   |                   |
| <b>Exon inclusion level</b>   | Human/rhesus >chimpanzee                                                                                                                              |                   |
| <b>Notes</b>                  | Chimpanzee specific decrease of exon 3 inclusion (coding). Exon 3 skipping results in alternative translational start site and N-terminal truncation. |                   |



|                               |                                                                                                      |                                                                                                                                                                                                   |
|-------------------------------|------------------------------------------------------------------------------------------------------|---------------------------------------------------------------------------------------------------------------------------------------------------------------------------------------------------|
| <b>Gene Symbol</b>            | PCCB                                                                                                 | <p><b>PCCB</b></p> <p>Clontech-1<br/>Clontech-2<br/>Ambion<br/>BioChain</p> <p>Hs<br/>069 100 123 230 327 355 487 507</p> <p>Pt<br/>12805 14453 14759 14775 17520 17528 17533 17504</p> <p>Rm</p> |
| <b>Exon genome coordinate</b> | +chr3:137528686-137528787                                                                            |                                                                                                                                                                                                   |
| <b>Full Name</b>              | Propionyl Coenzyme A carboxylase, beta polypeptide                                                   |                                                                                                                                                                                                   |
| <b>Exon inclusion level</b>   | Human/rhesus>chimpanzee                                                                              |                                                                                                                                                                                                   |
| <b>Notes</b>                  | Chimpanzee specific exon 12 (coding region) skipping which results in premature termination and NMD. |                                                                                                                                                                                                   |

|                               |                                                                                                               |                                                                                                                                                                                                             |
|-------------------------------|---------------------------------------------------------------------------------------------------------------|-------------------------------------------------------------------------------------------------------------------------------------------------------------------------------------------------------------|
| <b>Gene Symbol</b>            | ERMP1/KIAA1815                                                                                                | <p><b>ERMP1/KIAA1815</b></p> <p>Clontech-1<br/>Clontech-2<br/>Ambion<br/>BioChain</p> <p>Hs<br/>069 100 123 230 327 355 487 507</p> <p>Pt<br/>12805 14453 14759 14775 17520 17528 17533 17504</p> <p>Rm</p> |
| <b>Exon genome coordinate</b> | -chr9:5815091-5815219                                                                                         |                                                                                                                                                                                                             |
| <b>Full Name</b>              | Endoplasmic reticulum metalloproteinase 1                                                                     |                                                                                                                                                                                                             |
| <b>Exon inclusion level</b>   | Rhesus>human>chimpanzee                                                                                       |                                                                                                                                                                                                             |
| <b>Notes</b>                  | Skipping of exon 3 (coding region) results in alternative translational start site and N-terminal truncation. |                                                                                                                                                                                                             |

|                               |                                                                                                                                   |                                                                                                                                                                                                    |
|-------------------------------|-----------------------------------------------------------------------------------------------------------------------------------|----------------------------------------------------------------------------------------------------------------------------------------------------------------------------------------------------|
| <b>Gene Symbol</b>            | MACF1                                                                                                                             | <p><b>MACF1</b></p> <p>Clontech-1<br/>Clontech-2<br/>Ambion<br/>BioChain</p> <p>Hs<br/>069 100 123 230 327 355 487 507</p> <p>Pt<br/>12805 14453 14759 14775 17520 17528 17533 17504</p> <p>Rm</p> |
| <b>Exon genome coordinate</b> | +chr1:39707805-39707874                                                                                                           |                                                                                                                                                                                                    |
| <b>Full Name</b>              | microtubule-actin crosslinking factor 1                                                                                           |                                                                                                                                                                                                    |
| <b>Exon inclusion level</b>   | Human/chimpanzee>rhesus                                                                                                           |                                                                                                                                                                                                    |
| <b>Notes</b>                  | Inclusion of exon (coding region 69nt insertion between exon 98 and 99) results in 23aa insertion into the final protein product. |                                                                                                                                                                                                    |

|                               |                                                                                                                                           |  |
|-------------------------------|-------------------------------------------------------------------------------------------------------------------------------------------|--|
| <b>Gene Symbol</b>            | EGFL7                                                                                                                                     |  |
| <b>Exon genome coordinate</b> | +chr9:138683878-138683994                                                                                                                 |  |
| <b>Full Name</b>              | EGF-like-domain, multiple 7                                                                                                               |  |
| <b>Exon inclusion level</b>   | Chimpanzee>human>rhesus                                                                                                                   |  |
| <b>Notes</b>                  | Skipping of exon 5 (coding region) results in premature termination and NMD. Splicing patterns have individual variations within species. |  |

|                               |                                                                                                            |  |
|-------------------------------|------------------------------------------------------------------------------------------------------------|--|
| <b>Gene Symbol</b>            | MBD1                                                                                                       |  |
| <b>Exon genome coordinate</b> | -chr18:46055737-46055812                                                                                   |  |
| <b>Full Name</b>              | Methyl-CpG binding domain protein 1                                                                        |  |
| <b>Exon inclusion level</b>   | Human/chimpanzee>rhesus                                                                                    |  |
| <b>Notes</b>                  | Target exon is 75nt between exon 8 and 9, coding for a 25aa peptide insertion in the final protein product |  |

|                               |                                                                                           |  |
|-------------------------------|-------------------------------------------------------------------------------------------|--|
| <b>Gene Symbol</b>            | FMR1/FMRP                                                                                 |  |
| <b>Exon genome coordinate</b> | +chrX:146827309-146827372                                                                 |  |
| <b>Full Name</b>              | Fragile X mental retardation 1                                                            |  |
| <b>Exon inclusion level</b>   | Human/chimpanzee<rhesus                                                                   |  |
| <b>Notes</b>                  | Exon 12 inclusion results in the insertion of a 21aa peptide in the final protein product |  |

**Supplemental Table 3:** The rankings of RT-PCR confirmed splicing differences between human and chimpanzee or human and rhesus cerebellums among all events predicted by HJAY. Red indicates consistent results between RT-PCR and HJAY predictions. Blue indicates false positive predictions by HJAY. Green indicates false negatives by HJAY. ‘NA’ indicates an insufficient number of perfect-match probes targeting orthologous transcripts for between-species comparison of splicing.

| Gene symbol     | Exon location (hg18)     | Phylogenetic patterns of exon inclusion levels | Rank in human vs. chimpanzee | Rank in human vs. rhesus |
|-----------------|--------------------------|------------------------------------------------|------------------------------|--------------------------|
| ZFAND1          | chr8:82792039-82792078   | chimp>>human/rhesus                            | 13                           | NS                       |
| GPBP1L1         | chr1:45923834-45923879   | human/chimp>>rhesus                            | NS                           | 44                       |
| AMOTL1          | chr11:94167824-94167974  | rhesus>>human>chimp                            | NS                           | 76                       |
| LPHN3 /CIRL3    | chr4:62461031-62461070   | human<<chimp/rhesus                            | 206                          | 150                      |
| MAGOH           | chr1:53471801-53471912   | human<<chimp/rhesus                            | NS                           | 177                      |
| ACHP            | chr7:156173484-156173646 | chimp<human<<rhesus                            | 36                           | 50                       |
| PIGX            | chr3:197937922-197938039 | human>>chimp/rhesus                            | 5                            | NA                       |
| NUPL1           | chr13:24781384-24781420  | human>>chimp/rhesus                            | 94                           | NA                       |
| ZDHHC13 /HIP14L | chr11:19121105-19121246  | human<<chimp/rhesus                            | 172                          | NA                       |
| DDX42           | chr17:59206199-59206270  | human>>chimp>rhesus                            | 8                            | NA                       |
| PIGX            | chr3:197939969-197940023 | human>>chimp                                   | 1                            | NA                       |
| FACE2           | chr11:66346610-66346721  | human>>chimp                                   | 3                            | NA                       |
| GL014           | chr14:23656716-23656781  | human/chimp>>rhesus                            | NS                           | 185                      |
| ASRGL1          | chr11:61880372-61880515  | human/rhesus>chimp                             | 15                           | NS                       |
| AP1GBP1         | chr17:32954394-32954430  | human/chimp>rhesus                             | NA                           | 18                       |
| NAV2            | chr11:19862415-19862484  | human>chimp/rhesus                             | 12                           | NS                       |
| ZNF207          | chr17:27712599-27712647  | human/chimp>rhesus                             | NS                           | 8                        |
| PCCB            | chr3:137528686-137528787 | rhesus>human>chimp                             | 121                          | 131                      |
| GSTM3           | chr1:110083977-110084053 | human<chimp/rhesus                             | NA                           | 104                      |
| C1QDC1          | chr12:30777829-30777912  | human/chimp<rhesus                             | NS                           | 60                       |
| KCNJ3 /GIRK1    | chr2:155274360-155274577 | human<chimp/rhesus                             | NS                           | 251                      |
| SIPA1L1         | chr14:71241190-71241253  | human/chimp<rhesus                             | NS                           | 23                       |
| ERMP1           | chr9:5815091-5815219     | rhesus>human>chimp                             | 147                          | NA                       |
| ACSL3           | chr2:223473635-223473742 | human>chimp/rhesus                             | 2                            | NA                       |

|               |                          |                    |     |     |
|---------------|--------------------------|--------------------|-----|-----|
| <b>PTPRZ1</b> | chr7:121474963-121475080 | human>chimp/rhesus | 150 | NA  |
| <b>MACF1</b>  | chr1:39707805-39707874   | human/chimp>rhesus | 153 | 316 |
| <b>GLS</b>    | chr2:191527725-191527789 | human<chimp/rhesus | 239 | NS  |
| <b>DCLK1</b>  | chr13:35260348-35260422  | human/chimp<rhesus | NS  | 41  |
| <b>CAMTA1</b> | chr1:7738284-7738315     | human<chimp<rhesus | NS  | 59  |
| <b>EGFL7</b>  | chr9:138683878-138683994 | human/chimp>rhesus | NS  | 320 |
| <b>SOS1</b>   | chr2:39069914-39069959   | human/chimp>rhesus | NS  | 13  |
| <b>MBD1</b>   | chr18:46055737-46055812  | human/chimp>rhesus | 158 | 83  |
| <b>FMRP</b>   | chrX:146827309-146827372 | human/chimp<rhesus | NS  | 166 |

**Supplemental Table 4:** Cassette exons predicted by the HJAY array to have splicing differences between human and chimpanzee cerebellums. Columns ‘upstream junction’, ‘downstream junction’, ‘exon’ and ‘skip junction’ contain MADS+ p values of differential splicing between human and chimpanzee cerebellums. ‘+’ indicates higher exon inclusion levels in humans. ‘-’ indicates lower exon inclusion levels in humans. ‘NA’ indicates an insufficient number of perfect-match probes targeting orthologous transcripts for between-species comparison of splicing. Exons highlighted in red are true positive HJAY predictions confirmed by RT-PCR. Exons highlighted in blue are false positive HJAY predictions according to RT-PCR analysis. Exons are sorted based on the rankings of statistical significance for splicing differences between species.

| Gene symbol | Exon location (hg18)      | Strand | Upstream junction | Downstream junction | Exon     | Skip junction |
|-------------|---------------------------|--------|-------------------|---------------------|----------|---------------|
| PIGX        | chr3:197939969-197940023  | +      | +1.5E-35          | +3.8E-17            | +4.0E-22 | +9.5E-12      |
| ACSL3       | chr2:223473635-223473742  | +      | +3.0E-21          | +4.1E-32            | +6.9E-14 | +3.1E-06      |
| RCE1        | chr11:66346610-66346721   | +      | +9.9E-27          | +1.4E-31            | +1.1E-10 | +2.7E-07      |
| C14ORF159   | chr14:90693735-90693787   | +      | +1.2E-16          | +2.2E-17            | +2.2E-17 | +4.2E-09      |
| PIGX        | chr3:197937922-197938039  | +      | +5.2E-11          | +1.9E-32            | NA       | +1.1E-08      |
| PDE4DIP     | chr1:143729237-143729356  | -      | +3.8E-23          | NA                  | +4.7E-18 | +7.9E-03      |
| MFN2        | chr1:11965166-11965234    | +      | +4.4E-13          | +8.0E-19            | +1.8E-05 | +4.4E-14      |
| DDX42       | chr17:59206199-59206270   | +      | +3.2E-12          | +1.1E-23            | +4.4E-07 | +4.2E-07      |
| RHOT1       | chr17:27524068-27524192   | +      | +6.1E-17          | NA                  | +5.7E-22 | +7.3E-05      |
| B3GALNT1    | chr3:162290425-162290544  | -      | +5.4E-19          | +2.0E-18            | NA       | +3.2E-03      |
| GRK4        | chr4:2956037-2956133      | +      | NA                | +2.5E-11            | +4.9E-22 | +7.6E-03      |
| NAV2        | chr11:19862415-19862484   | +      | +4.5E-13          | +7.0E-04            | +3.4E-13 | +7.8E-09      |
| ZFAND1      | chr8:82792038-82792078    | -      | -2.3E-09          | -1.5E-13            | -1.4E-08 | -2.1E-08      |
| APLP2       | chr11:129498716-129498884 | +      | +5.5E-09          | +4.9E-05            | +4.6E-08 | +3.7E-15      |
| ASRGL1      | chr11:61880372-61880515   | +      | NA                | +3.4E-09            | +3.8E-03 | +5.2E-14      |
| SNRPN       | chr15:22794605-22794726   | +      | NA                | -2.5E-10            | NA       | -5.8E-10      |
| FIP1L1      | chr4:53975538-53975646    | +      | NA                | +1.1E-11            | +9.5E-07 | +1.6E-05      |
| DMTF1       | chr7:86630490-86630584    | +      | NA                | NA                  | +1.1E-08 | +1.1E-07      |
| LMBR1       | chr7:156221947-156222070  | -      | -1.7E-07          | NA                  | -2.1E-09 | -1.8E-12      |
| ZNF638      | chr2:71514113-71514173    | +      | NA                | NA                  | +1.9E-14 | +8.4E-08      |
| TJP2        | chr9:71055770-71056100    | +      | +1.8E-08          | +4.0E-05            | +3.6E-03 | +5.7E-17      |
| ABCA5       | chr17:64833434-64833553   | -      | NA                | +4.8E-11            | +3.3E-07 | +1.8E-04      |
| FLJ45455    | chr17:11395937-11395994   | +      | NA                | +2.2E-15            | +2.7E-07 | +1.8E-03      |
| TLL7        | chr1:84125447-84125555    | -      | NA                | NA                  | +9.6E-03 | +2.0E-15      |
| SUZ12P      | chr17:26110634-26110683   | +      | +3.6E-05          | +1.8E-10            | NA       | +5.7E-04      |
| RBM12B      | chr8:94822032-94822100    | -      | +2.6E-15          | NA                  | +1.5E-03 | +4.7E-06      |
| OGT         | chrX:70691764-70691960    | +      | -2.4E-04          | -1.6E-02            | -2.4E-04 | -9.6E-20      |
| PAK7        | chr20:9747327-9747433     | -      | +2.4E-09          | NA                  | +3.2E-03 | +2.2E-09      |
| ANKS1B      | chr12:97725752-97725824   | -      | -1.3E-07          | -3.4E-03            | -2.0E-07 | -5.1E-11      |
| THOC5       | chr22:28257066-28257099   | -      | -7.0E-08          | NA                  | NA       | -2.7E-11      |
| NAPB        | chr20:23325708-23325819   | -      | NA                | -5.7E-01            | -1.9E-09 | -3.6E-17      |
| NAV2        | chr11:20034651-20034750   | +      | NA                | NA                  | +5.4E-03 | +2.1E-04      |
| SLC4A10     | chr2:162438671-162438761  | +      | -7.2E-02          | -2.6E-06            | -3.0E-13 | -2.8E-08      |
| EIF4ENIF1   | chr22:30176274-30176346   | -      | +1.0E-09          | +1.9E-05            | +6.0E-07 | +2.1E-04      |
| MCF2L       | chr13:112793435-112793510 | +      | -1.1E-02          | -2.7E-06            | -2.2E-10 | -3.5E-03      |

|                 |                           |   |          |          |          |          |
|-----------------|---------------------------|---|----------|----------|----------|----------|
| <b>LMBR1</b>    | chr7:156173484-156173646  | - | +3.4E-07 | +1.7E-05 | +1.1E-07 | +3.9E-08 |
| <b>TMEM144</b>  | chr4:159376039-159376107  | + | +4.8E-16 | +1.9E-02 | +5.4E-02 | +3.6E-09 |
| <b>C10ORF76</b> | chr10:103743284-103743350 | - | +1.7E-06 | +9.4E-06 | +7.3E-06 | +6.5E-10 |
| <b>SPTLC1</b>   | chr9:93881536-93881669    | - | +4.2E-08 | NA       | NA       | +2.4E-08 |
| <b>PIGN</b>     | chr18:57981743-57981869   | - | NA       | +2.8E-09 | NA       | +5.1E-08 |
| <b>AFMID</b>    | chr17:73713621-73713726   | + | +1.1E-07 | -1.8E-16 | NA       | -1.7E-06 |
| <b>ZNF211</b>   | chr19:62843091-62843247   | + | NA       | -1.5E-07 | -6.3E-05 | -7.4E-04 |
| <b>FAM49B</b>   | chr8:130985926-130986013  | - | -6.4E-01 | +1.1E-08 | +6.7E-12 | +1.3E-07 |
| <b>CD74</b>     | chr5:149762876-149763068  | - | +8.9E-08 | +1.4E-05 | +9.5E-07 | +6.2E-04 |
| <b>RSU1</b>     | chr10:16898977-16899089   | - | -3.8E-08 | -1.0E-05 | -1.9E-03 | -2.3E-05 |
| <b>SLITRK2</b>  | chrX:144711214-144711363  | + | +1.6E-09 | NA       | +2.0E-01 | +3.6E-13 |
| <b>SEC24C</b>   | chr10:75176393-75176480   | + | +1.6E-06 | +4.2E-11 | +1.6E-02 | +5.3E-05 |
| <b>PACRGL</b>   | chr4:20335528-20335609    | + | NA       | -7.7E-04 | -2.7E-04 | -1.3E-12 |
| <b>ASNS</b>     | chr7:97337025-97337061    | - | +4.5E-09 | NA       | +1.1E-05 | +6.8E-05 |
| <b>PLA2G4C</b>  | chr19:53299656-53299793   | - | NA       | NA       | +3.3E-03 | +2.9E-04 |
| <b>HSD17B14</b> | chr19:54008524-54008621   | - | -1.2E-06 | NA       | NA       | -1.9E-09 |
| <b>ANK1</b>     | chr8:41638550-41638616    | - | +3.5E-09 | +2.1E-01 | +7.7E-07 | +6.5E-05 |
| <b>ODF2</b>     | chr9:130271282-130271453  | + | +7.8E-05 | +7.1E-03 | +4.3E-03 | +4.9E-11 |
| <b>TBC1D9B</b>  | chr5:179227050-179227101  | - | +1.7E-06 | +2.1E-05 | +2.5E-03 | +2.2E-10 |
| <b>EVL</b>      | chr14:99673829-99673892   | + | +3.5E-04 | +3.0E-04 | +6.3E-04 | +1.2E-14 |
| <b>RNF146</b>   | chr6:127645124-127645233  | + | NA       | -3.8E-02 | -5.8E-17 | -4.7E-03 |
| <b>TRPC1</b>    | chr3:143937910-143938065  | + | -9.8E-02 | +1.2E-03 | +5.1E-07 | +9.6E-12 |
| <b>TRMT11</b>   | chr6:126369680-126369793  | + | +1.5E-11 | +1.9E-02 | NA       | +4.2E-07 |
| <b>C4ORF30</b>  | chr4:17420257-17420413    | - | NA       | NA       | -7.0E-05 | -2.8E-08 |
| <b>LZTR1</b>    | chr22:19671792-19671872   | + | -1.7E-02 | -2.9E-08 | -5.2E-02 | -1.6E-11 |
| <b>UBA2</b>     | chr19:39613320-39613404   | + | -5.1E-03 | -3.3E-13 | -2.0E-02 | -5.9E-06 |
| <b>DNER</b>     | chr2:229991067-229991190  | - | +1.0E-05 | +1.1E-05 | NA       | +9.1E-08 |
| <b>PLEKHM2</b>  | chr1:15920410-15920470    | + | +2.1E-06 | +2.6E-06 | +5.2E-04 | +1.7E-04 |
| <b>PDXK</b>     | chr21:43988032-43988116   | + | +8.6E-14 | +1.3E-01 | +1.3E-05 | +9.7E-04 |
| <b>BCAS3</b>    | chr17:56120162-56120338   | + | +5.4E-10 | NA       | NA       | +3.0E-03 |
| <b>ABLIM3</b>   | chr5:148600431-148600530  | + | +6.1E-04 | +6.6E-06 | +9.5E-03 | +1.3E-11 |
| <b>WNK1</b>     | chr12:858999-859458       | + | -2.9E-02 | -3.4E-08 | -1.7E-05 | -4.3E-08 |
| <b>PTPRN</b>    | chr2:219872665-219872752  | - | -8.0E-08 | -2.3E-05 | -3.9E-04 | -3.2E-04 |
| <b>SLC25A32</b> | chr8:104494826-104494935  | - | +1.7E-08 | +2.7E-04 | +5.6E-04 | +6.7E-03 |
| <b>GPR155</b>   | chr2:175055983-175056132  | - | NA       | NA       | +2.2E-03 | +4.4E-08 |
| <b>SRPK2</b>    | chr7:104553464-104553557  | - | -4.0E-05 | -4.7E-10 | -4.8E-04 | -8.0E-04 |
| <b>MLLT4</b>    | chr6:168037390-168037435  | + | NA       | +1.4E-05 | +4.1E-04 | +5.6E-06 |
| <b>ATP5H</b>    | chr17:70547781-70547853   | - | -4.7E-06 | +2.6E-01 | -2.0E-03 | -5.2E-12 |
| <b>DGUOK</b>    | chr2:74037759-74037875    | + | -1.3E-01 | -8.5E-03 | -3.4E-06 | -2.7E-14 |
| <b>SRI</b>      | chr7:87682045-87682187    | - | -2.3E-04 | NA       | -1.1E-07 | -4.1E-06 |
| <b>PFKM</b>     | chr12:46805374-46805612   | + | NA       | NA       | -1.6E-08 | -2.9E-04 |
| <b>CROP</b>     | chr17:46170496-46170559   | + | -1.8E-07 | NA       | NA       | -5.6E-06 |
| <b>UBQLN1</b>   | chr9:85471084-85471168    | - | +2.8E-04 | +2.3E-07 | +1.3E-01 | +1.3E-03 |
| <b>SARS</b>     | chr1:109580949-109581015  | + | -1.5E-01 | -1.4E-08 | -6.2E-07 | -5.4E-06 |
| <b>ZC3H14</b>   | chr14:88104135-88104250   | + | +9.1E-06 | +1.5E-05 | +4.5E-04 | +2.0E-04 |
| <b>BCAS3</b>    | chr17:56120162-56120338   | + | +5.4E-10 | NA       | NA       | +3.0E-03 |
| <b>GLMN</b>     | chr1:92504844-92504886    | - | -1.6E-09 | NA       | -2.0E-02 | -7.0E-05 |
| <b>SAPS2</b>    | chr22:49174328-49174406   | + | NA       | -2.8E-07 | -1.2E-02 | -1.8E-06 |
| <b>LARP1</b>    | chr5:154153552-154153753  | + | -8.7E-10 | -1.6E-02 | -5.4E-04 | -5.4E-05 |
| <b>TJP2</b>     | chr9:71054110-71054221    | + | -7.9E-07 | -1.0E-01 | -2.1E-05 | -1.8E-08 |

|          |                                          |   |          |          |          |          |
|----------|------------------------------------------|---|----------|----------|----------|----------|
| PHF14    | chr7:10988523-10989311                   | + | -1.0E-04 | -1.8E-03 | -1.1E-07 | -9.6E-06 |
| TTC8     | chr14:88377521-88377611                  | + | -1.3E-01 | -1.0E-03 | -1.0E-01 | -5.5E-17 |
| VCAN     | chr5:82850923-82853884                   | + | -6.8E-01 | NA       | -4.1E-07 | -1.5E-10 |
| ELP2     | chr18:31973379-31973574                  | + | +2.7E-01 | NA       | +8.9E-05 | +5.5E-07 |
| XPO6     | <a href="#">chr16:28071751-28071786</a>  | - | NA       | -2.2E-04 | -9.5E-09 | -1.4E-03 |
| AMPH     | chr7:38423949-38424075                   | - | +4.0E-04 | +4.0E-01 | +1.2E-02 | +6.3E-06 |
| SNAP25   | chr20:10172622-10172682                  | + | +3.0E-04 | +1.8E-09 | +1.5E-01 | +1.2E-03 |
| FAF1     | chr1:50690052-50690453                   | - | NA       | NA       | +7.1E-07 | +1.2E-03 |
| NUPL1    | <a href="#">chr13:24781384-24781420</a>  | + | +1.1E-04 | +5.6E-03 | +6.8E-06 | +3.8E-06 |
| RHOT1    | chr17:27558643-27558695                  | + | NA       | NA       | +1.5E-06 | +1.4E-03 |
| CADM2    | chr3:86111003-86111123                   | + | +2.5E-15 | +1.8E-03 | -5.9E-02 | +5.3E-03 |
| EXOC7    | chr17:71598004-71598073                  | - | -2.8E-03 | NA       | -1.2E-04 | -7.1E-08 |
| EDC3     | chr15:72766484-72766573                  | - | +4.5E-01 | +2.7E-13 | NA       | +2.7E-03 |
| UGP2     | chr2:63935521-63935574                   | + | NA       | NA       | -1.1E-07 | -5.6E-04 |
| SPOP     | chr17:45069119-45069170                  | - | -1.8E-01 | +1.8E-08 | NA       | +5.2E-08 |
| SNRK     | chr3:43306235-43306285                   | + | -6.3E-01 | +3.4E-14 | -2.8E-01 | +1.4E-05 |
| ATP2B4   | chr1:201968973-201969081                 | + | -7.3E-02 | NA       | -2.2E-03 | -1.1E-09 |
| AHI1     | chr6:135860018-135860080                 | - | +1.8E-03 | NA       | +1.1E-07 | +7.7E-03 |
| SS18     | chr18:21916324-21916490                  | - | NA       | NA       | +1.5E-05 | +1.6E-04 |
| PKM2     | chr15:70282416-70282583                  | - | +7.0E-05 | +1.8E-03 | +4.9E-04 | +6.6E-06 |
| ICA1L    | chr2:203442503-203442573                 | - | NA       | -1.0E-07 | -8.3E-02 | -1.2E-04 |
| SLC38A1  | chr12:44934863-44934986                  | - | NA       | NA       | +4.0E-05 | +2.2E-05 |
| HIVEP2   | <a href="#">chr6:143146350-143146445</a> | - | +6.3E-04 | +8.2E-04 | +7.1E-05 | +7.9E-06 |
| UBE3B    | chr12:108403824-108403930                | + | +9.5E-07 | +2.5E-01 | -1.1E-01 | +1.6E-05 |
| AGFG1    | chr2:228105097-228105169                 | + | NA       | NA       | -8.6E-06 | -2.1E-05 |
| HNRNPD   | chr4:83495071-83495178                   | - | -3.0E-04 | -1.7E-06 | -7.8E-02 | -1.3E-06 |
| AGFG2    | chr7:99992152-99992185                   | + | +1.0E-05 | +2.2E-06 | NA       | +2.2E-03 |
| NDUFV1   | chr11:67135943-67136025                  | + | +4.6E-06 | +2.4E-02 | +2.3E-06 | +9.4E-04 |
| C16ORF61 | chr16:79589390-79589457                  | - | NA       | NA       | +9.1E-04 | +6.0E-07 |
| TSPAN3   | chr15:75135185-75135260                  | - | +6.6E-10 | -4.9E-02 | +6.7E-02 | +4.7E-07 |
| KIAA0802 | chr18:8799445-8799559                    | + | +7.6E-07 | NA       | -2.0E-04 | -1.1E-09 |
| CSDE1    | chr1:115085670-115085817                 | - | +1.3E-05 | NA       | +3.4E-01 | +6.2E-03 |
| ZNF385B  | chr2:180095853-180095892                 | - | NA       | -4.1E-08 | NA       | -9.9E-03 |
| COBL     | chr7:51207646-51207721                   | - | NA       | NA       | -2.3E-05 | -7.9E-04 |
| SRRM1    | chr1:24846156-24846286                   | + | -1.1E-04 | NA       | -3.0E-02 | -2.6E-07 |
| PCCB     | <a href="#">chr3:137528686-137528787</a> | + | +2.0E-01 | +2.6E-06 | +6.5E-06 | +2.6E-04 |
| VPS39    | chr15:40271555-40271588                  | - | +3.3E-06 | NA       | NA       | +7.9E-04 |
| HNRPDL   | chr4:83565739-83565844                   | - | +5.2E-01 | -2.7E-02 | -5.8E-08 | -6.6E-09 |
| C11ORF58 | chr11:16730907-16731017                  | + | NA       | -3.5E-07 | -4.4E-03 | -8.9E-03 |
| C11ORF60 | chr11:117933662-117933815                | - | NA       | -4.0E-04 | -7.6E-06 | -2.6E-04 |
| MFSD11   | chr17:72249853-72249950                  | + | NA       | NA       | +2.8E-07 | +7.7E-03 |
| AP3M2    | chr8:42132653-42132714                   | + | NA       | NA       | -9.2E-05 | -6.9E-05 |
| ERMP1    | chr9:5795026-5795217                     | - | -1.9E-01 | +7.2E-01 | -5.8E-03 | -3.6E-12 |
| ARIH2    | chr3:48957572-48957618                   | + | -5.1E-04 | -8.7E-03 | -3.8E-05 | -7.3E-05 |
| DCUN1D4  | chr4:52448045-52448167                   | + | -7.6E-02 | -2.5E-03 | -3.8E-07 | -2.8E-06 |
| WASF1    | chr6:110588530-110588628                 | - | NA       | +1.0E-03 | -4.7E-01 | +8.4E-06 |
| TBCK     | chr4:107378096-107378144                 | - | -6.9E-03 | -7.9E-05 | -1.9E-06 | -3.4E-04 |
| DTNA     | chr18:30563424-30563508                  | + | -2.8E-05 | NA       | NA       | -3.0E-04 |
| AAAS     | chr12:51994801-51994900                  | - | NA       | NA       | -4.2E-05 | -3.5E-04 |
| ZFYVE16  | chr5:79759066-79759120                   | + | NA       | +4.6E-03 | NA       | +1.0E-04 |

|          |                           |   |          |          |          |          |
|----------|---------------------------|---|----------|----------|----------|----------|
| VPS24    | chr2:86622885-86622946    | - | -5.4E-05 | -3.0E-01 | -1.6E-03 | -5.2E-08 |
| ENPP2    | chr8:120653596-120653671  | - | +9.7E-05 | NA       | +7.9E-02 | +5.3E-06 |
| P2RX4    | chr12:120139319-120139467 | + | -6.7E-01 | +3.2E-07 | +5.7E-02 | +5.0E-03 |
| SAPS2    | chr22:49177161-49177310   | + | +3.9E-03 | +6.4E-03 | -6.2E-01 | +2.8E-07 |
| SOCS4    | chr14:54568330-54568459   | + | +2.9E-03 | +5.1E-03 | +1.6E-02 | +3.0E-05 |
| PTPRM    | chr18:8112239-8112314     | + | +1.4E-10 | -3.4E-03 | +1.5E-09 | -1.9E-04 |
| SNX6     | chr14:34143091-34143225   | - | -2.4E-05 | -3.5E-05 | -3.2E-02 | -1.8E-03 |
| LRP8     | chr1:53513890-53514013    | - | +4.2E-03 | +2.2E-01 | -4.7E-02 | +1.3E-07 |
| NDRG3    | chr20:34716617-34716656   | - | -7.5E-03 | -2.5E-05 | -1.7E-02 | -1.4E-04 |
| GUCY1A2  | chr11:106122486-106122579 | - | -1.8E-04 | NA       | NA       | -4.3E-04 |
| ABLIM1   | chr10:116223627-116223705 | - | NA       | +6.0E-05 | NA       | +6.2E-03 |
| ERMP1    | chr9:5815091-5815219      | - | +1.6E-03 | +1.3E-03 | +4.5E-02 | +6.5E-07 |
| PDP1     | chr8:94999314-94999349    | + | -1.5E-03 | -1.8E-02 | -1.4E-06 | -4.8E-03 |
| KRIT1    | chr7:91712714-91712824    | - | NA       | NA       | -7.4E-04 | -7.4E-06 |
| PTPRZ1   | chr7:121474963-121475080  | + | +6.4E-02 | +1.5E-07 | +2.5E-03 | +1.6E-03 |
| FAM118B  | chr11:125604329-125604398 | + | +6.4E-02 | +1.0E-07 | NA       | +5.8E-03 |
| TRIP12   | chr2:230433365-230433491  | - | +8.6E-04 | +1.9E-04 | +1.7E-03 | +7.6E-03 |
| MACF1    | chr1:39707805-39707874    | + | -6.1E-01 | -6.8E-03 | -3.8E-05 | -1.8E-04 |
| CD59     | chr11:33711616-33711732   | - | -8.4E-02 | -3.6E-03 | -1.1E-03 | -6.4E-03 |
| PPP2R4   | chr9:130944780-130944907  | + | -1.8E-04 | -1.7E-02 | NA       | -3.9E-05 |
| ZNF415   | chr19:58310768-58310876   | - | NA       | +1.5E-01 | -4.7E-03 | -9.4E-12 |
| CCNDBP1  | chr15:41273570-41273627   | + | NA       | +3.4E-07 | +3.0E-01 | +8.8E-03 |
| MBD1     | chr18:46055737-46055812   | - | +9.8E-06 | +1.6E-02 | +1.9E-03 | +2.9E-04 |
| EIF2B5   | chr3:185339328-185339421  | + | -4.1E-03 | -2.4E-02 | NA       | -2.2E-05 |
| ZNF346   | chr5:176382766-176382841  | + | NA       | NA       | +7.2E-03 | +5.6E-05 |
| PANX2    | chr22:48955987-48956038   | + | -1.2E-04 | NA       | -1.6E-01 | -3.1E-05 |
| AGTPBP1  | chr9:87483069-87483133    | - | +8.8E-02 | -7.3E-06 | NA       | -2.6E-06 |
| GSTA4    | chr6:52960113-52960165    | - | -8.2E-07 | -3.9E-03 | -4.2E-01 | -4.2E-05 |
| SUZ12P   | chr17:26094444-26094513   | + | -1.8E-04 | +3.6E-05 | -2.2E-04 | -9.2E-09 |
| BBS1     | chr11:66035251-66035286   | + | NA       | -3.6E-04 | -1.4E-02 | -1.5E-04 |
| KIAA0146 | chr8:48369008-48369172    | + | +2.4E-04 | +2.8E-03 | +1.6E-01 | +7.3E-06 |
| RAPGEF6  | chr5:130792493-130792808  | - | +2.9E-02 | +2.6E-04 | NA       | +2.3E-05 |
| NAT15    | chr16:3437482-3437621     | + | NA       | +8.6E-03 | NA       | +2.2E-03 |
| MYO18A   | chr17:24436747-24436792   | - | -8.5E-05 | NA       | -8.7E-03 | -2.4E-03 |
| SDR39U1  | chr14:23981223-23981306   | - | +8.0E-05 | +1.7E-03 | +1.7E-01 | +3.3E-05 |
| ACBD5    | chr10:27564026-27564147   | - | +3.5E-02 | +6.6E-04 | +1.6E-03 | +5.4E-05 |
| ZDHHC13  | chr11:19121105-19121246   | + | -6.0E-04 | -8.2E-02 | -1.7E-02 | -2.0E-06 |
| OSBPL1A  | chr18:20073181-20073344   | - | -1.0E-05 | -2.6E-02 | -8.9E-04 | -1.1E-03 |
| HPS4     | chr22:25197178-25197354   | - | NA       | -4.0E-04 | -3.6E-02 | -1.7E-05 |
| PHF20    | chr20:33950705-33950984   | + | +2.0E-03 | +3.1E-02 | +1.8E-01 | +1.1E-03 |
| CD59     | chr11:33709545-33709590   | - | -3.6E-03 | NA       | +1.1E-03 | +2.4E-05 |
| MFGE8    | chr15:87254026-87254158   | - | +4.9E-03 | +3.8E-02 | +2.5E-02 | +2.5E-05 |
| SPPL2A   | chr15:48805561-48805615   | - | NA       | NA       | -8.1E-05 | -5.9E-03 |
| GALK2    | chr15:47361475-47361574   | + | +6.0E-02 | +1.2E-04 | +1.1E-02 | +2.1E-04 |
| PICALM   | chr11:85365313-85365373   | - | -3.0E-03 | +4.1E-03 | -1.1E-01 | +9.3E-14 |
| SORBS1   | chr10:97144357-97144420   | - | -4.5E-04 | NA       | -6.8E-02 | -6.7E-05 |
| SPATS2L  | chr2:201012089-201012296  | + | NA       | +3.1E-02 | +1.4E-03 | +8.6E-05 |
| ZNF227   | chr19:49425725-49425809   | + | -1.4E-03 | +6.7E-02 | +4.5E-01 | -8.0E-13 |
| CDC42BPB | chr14:102490287-102490365 | - | -1.2E-01 | +1.8E-05 | +5.0E-02 | +2.6E-07 |
| TAPT1    | chr4:15807378-15807444    | - | NA       | -3.4E-03 | NA       | -2.1E-03 |



|                  |                           |   |          |          |          |          |
|------------------|---------------------------|---|----------|----------|----------|----------|
| <b>BIN1</b>      | chr2:127534641-127534686  | - | -5.0E-03 | NA       | NA       | -3.3E-04 |
| <b>C5ORF33</b>   | chr5:36244483-36244549    | - | NA       | -2.1E-01 | -2.1E-06 | -7.2E-03 |
| <b>MBNL1</b>     | chr3:153658608-153658672  | + | -8.6E-02 | NA       | -2.4E-04 | -2.1E-04 |
| <b>USP4</b>      | chr3:49291250-49291339    | - | -5.6E-05 | -7.9E-02 | -3.3E-02 | -1.6E-03 |
| <b>AGPAT3</b>    | chr21:44204940-44205088   | + | +2.7E-05 | NA       | +4.1E-01 | +2.7E-05 |
| <b>SERGEF</b>    | chr11:17988193-17988262   | - | -1.4E-01 | +2.1E-09 | +3.0E-01 | +4.0E-04 |
| <b>FZD3</b>      | chr8:28413368-28413414    | + | -5.4E-02 | NA       | -8.3E-03 | -9.1E-06 |
| <b>TPM1</b>      | chr15:61140964-61141040   | + | -9.2E-05 | +5.5E-05 | +6.7E-06 | +9.8E-03 |
| <b>KIAA2026</b>  | chr9:5934870-5934960      | - | -7.0E-01 | NA       | +4.3E-03 | +6.4E-07 |
| <b>G3BP2</b>     | chr4:76798190-76798289    | - | -2.8E-02 | +2.5E-01 | -1.1E-03 | -1.3E-07 |
| <b>CADM1</b>     | chr11:114585503-114585587 | - | -5.5E-03 | -1.5E-01 | NA       | -1.4E-05 |
| <b>FN1</b>       | chr2:215965898-215966171  | - | +2.2E-04 | +1.3E-03 | +9.6E-02 | +4.1E-03 |
| <b>ASPH</b>      | chr8:62757551-62757596    | - | -8.3E-04 | -9.6E-02 | -4.5E-02 | -8.8E-04 |
| <b>TM2D1</b>     | chr1:61925051-61925181    | - | +4.7E-03 | NA       | NA       | +7.7E-03 |
| <b>WDR20</b>     | chr14:101733844-101733937 | + | -1.7E-01 | NA       | -2.3E-05 | -3.8E-04 |
| <b>CLUAP1</b>    | chr16:3523099-3523156     | + | +7.0E-02 | +9.3E-02 | +1.7E-05 | +7.8E-04 |
| <b>PNPLA6</b>    | chr19:7506012-7506088     | + | -4.3E-04 | +6.1E-01 | NA       | -3.7E-06 |
| <b>SHF</b>       | chr15:43253065-43253206   | - | +7.8E-08 | -3.1E-02 | +4.7E-02 | +9.2E-04 |
| <b>DGKG</b>      | chr3:187469283-187469400  | - | +1.2E-01 | +7.8E-04 | +1.6E-01 | +5.2E-06 |
| <b>CADM1</b>     | chr11:114574335-114574368 | - | +1.4E-05 | +1.3E-01 | -1.9E-01 | +6.4E-05 |
| <b>LPHN3</b>     | chr4:62461031-62461070    | + | -7.7E-02 | -1.5E-03 | NA       | -4.5E-04 |
| <b>ZNF706</b>    | chr8:102283736-102283851  | - | -7.8E-02 | +1.5E-05 | NA       | +1.4E-04 |
| <b>POLB</b>      | chr8:42315686-42315744    | + | -3.5E-05 | -1.4E-01 | -4.3E-02 | -1.1E-03 |
| <b>CUGBP2</b>    | chr10:11402825-11402867   | + | -8.8E-02 | -1.7E-03 | NA       | -5.4E-04 |
| <b>PATL1</b>     | chr11:59180004-59180094   | - | +1.8E-07 | +6.3E-01 | -5.3E-01 | +7.1E-05 |
| <b>NDRG4</b>     | chr16:57092392-57092482   | + | -2.9E-01 | +1.7E-09 | -4.2E-02 | +2.5E-04 |
| <b>SLC4A7</b>    | chr3:27447792-27448164    | - | -9.5E-02 | NA       | -3.7E-04 | -2.7E-03 |
| <b>FLRT3</b>     | chr20:14257779-14257973   | - | -7.8E-02 | +9.4E-04 | -3.3E-04 | -1.7E-04 |
| <b>DMWD</b>      | chr19:50979738-50979813   | - | +1.4E-01 | -5.2E-03 | +5.5E-02 | -1.0E-04 |
| <b>FAM135A</b>   | chr6:71252590-71252668    | + | -9.6E-03 | NA       | -4.2E-01 | -9.0E-07 |
| <b>TNIK</b>      | chr3:172329196-172329361  | - | -1.6E-01 | -9.7E-02 | -1.4E-03 | -5.8E-05 |
| <b>GPD1L</b>     | chr3:32144571-32144749    | + | +2.2E-01 | +8.2E-05 | +1.3E-02 | +7.1E-04 |
| <b>XPA</b>       | chr9:99484302-99484533    | - | NA       | -2.7E-01 | +2.1E-05 | +2.6E-03 |
| <b>BAALC</b>     | chr8:104294322-104294489  | + | NA       | NA       | -5.9E-03 | -4.3E-03 |
| <b>MMS19</b>     | chr10:99233849-99233898   | - | -1.7E-01 | -3.6E-02 | +1.7E-08 | +3.5E-04 |
| <b>ZNF346</b>    | chr5:176401384-176401477  | + | +4.5E-03 | -3.2E-01 | +6.3E-02 | +9.1E-03 |
| <b>NPEPPS</b>    | chr17:43009409-43009525   | + | -6.3E-02 | NA       | -7.7E-03 | -4.4E-04 |
| <b>KIF13A</b>    | chr6:17879323-17879428    | - | -2.5E-01 | NA       | -5.0E-04 | -7.9E-04 |
| <b>C10ORF76</b>  | chr10:103639158-103639237 | - | +9.4E-03 | -9.8E-02 | +1.1E-04 | +3.1E-04 |
| <b>C16ORF35</b>  | chr16:113505-113544       | - | -8.3E-03 | -3.4E-01 | +5.9E-03 | +3.9E-06 |
| <b>INTS12</b>    | chr4:106844253-106844415  | - | -6.6E-02 | NA       | +5.1E-06 | +1.7E-03 |
| <b>GIGYF2</b>    | chr2:233273538-233273608  | + | +9.8E-02 | +5.0E-02 | +2.5E-04 | +6.6E-04 |
| <b>TCEB1</b>     | chr8:75034553-75034607    | - | +2.3E-01 | +8.1E-02 | +9.0E-03 | +7.8E-04 |
| <b>ADCYAP1R1</b> | chr7:31106268-31106349    | + | NA       | -2.1E-01 | +2.6E-03 | +4.9E-05 |
| <b>LSM14B</b>    | chr20:60137375-60137483   | + | -8.5E-03 | NA       | -1.3E-03 | -4.1E-03 |
| <b>SNED1</b>     | chr2:241661353-241661452  | + | -7.4E-03 | -1.1E-04 | -1.7E-01 | -7.9E-04 |
| <b>RSBN1</b>     | chr1:114140330-114140448  | - | NA       | -4.1E-01 | -1.8E-04 | -2.4E-03 |
| <b>CAMK2G</b>    | chr10:75257852-75257885   | - | -2.3E-01 | +2.0E-03 | -4.9E-04 | -5.9E-06 |
| <b>PHF21A</b>    | chr11:46068581-46068693   | - | +1.7E-01 | -6.7E-04 | -2.5E-02 | -5.1E-05 |
| <b>CPNE3</b>     | chr8:87606220-87606341    | + | NA       | -3.5E-04 | -2.1E-01 | -6.7E-03 |

|           |                           |   |          |          |          |          |
|-----------|---------------------------|---|----------|----------|----------|----------|
| ERLEC1    | chr2:53888939-53889101    | + | +5.6E-01 | NA       | -5.8E-05 | -9.4E-04 |
| LRRC8A    | chr9:130688114-130688221  | + | -1.6E-01 | +1.5E-04 | +3.7E-03 | +9.2E-03 |
| TTC8      | chr14:88369789-88369819   | + | +8.8E-02 | +7.6E-02 | +7.3E-04 | +9.7E-04 |
| GLS       | chr2:191527725-191527789  | + | -4.4E-03 | +4.5E-02 | -4.9E-02 | -5.0E-05 |
| SLC6A6    | chr3:14484599-14484724    | + | +7.9E-04 | -1.4E-02 | +7.4E-04 | +9.7E-03 |
| INPP5K    | chr17:1365931-1366160     | - | -2.8E-01 | NA       | +2.6E-03 | +5.3E-04 |
| RAB11FIP2 | chr10:119783482-119783542 | - | +1.8E-01 | +1.2E-03 | -3.3E-01 | +3.9E-04 |
| SRGAP2    | chr1:204698339-204698378  | + | NA       | 5.8E-04+ | 2.8E-01- | 2.0E-03  |
| NRXN2     | chr11:64201040-64201085   | - | +3.7E-04 | NA       | +6.6E-01 | +8.5E-03 |
| MADD      | chr11:47270669-47270723   | + | -3.4E-03 | +3.0E-01 | -1.0E-02 | -2.2E-04 |
| MEIS1     | chr2:66592784-66592930    | + | +1.8E-01 | +1.7E-03 | +6.0E-02 | +5.1E-03 |
| SAPS2     | chr22:49222282-49222363   | + | -1.6E-04 | +5.1E-06 | +4.8E-02 | +2.5E-03 |
| SPIRE1    | chr18:12475957-12475999   | - | -5.9E-01 | +1.8E-01 | +4.4E-03 | +4.1E-05 |
| LAPTM4A   | chr2:20100779-20100856    | - | +8.1E-03 | +1.0E-01 | +3.0E-01 | +3.2E-04 |
| PUF60     | chr8:144974823-144974874  | - | +6.0E-03 | +4.6E-01 | +6.5E-01 | +3.0E-06 |
| RNF14     | chr5:141334552-141334704  | + | +3.8E-05 | -5.9E-01 | +4.1E-01 | +3.0E-03 |
| FUZ       | chr19:55004446-55004644   | - | +9.9E-03 | -3.7E-01 | NA       | +5.0E-04 |
| CD59      | chr11:33709545-33709590   | - | -3.6E-03 | NA       | +1.1E-03 | +2.4E-05 |
| USMG5     | chr10:105143945-105144141 | - | -7.2E-02 | NA       | +6.3E-03 | +3.5E-04 |
| CDC42BPA  | chr1:225302250-225302334  | - | +6.4E-01 | +2.7E-03 | -1.5E-01 | +5.7E-04 |
| PLCB4     | chr20:9333959-9333995     | + | +4.3E-01 | +2.0E-01 | +2.5E-03 | +1.3E-03 |
| C18ORF25  | chr18:42073968-42074151   | + | -3.2E-01 | -3.8E-01 | -4.2E-03 | -1.3E-04 |
| WDFY3     | chr4:85867037-85867088    | - | -5.0E-01 | +6.9E-04 | -5.6E-01 | +4.1E-05 |
| ZNF227    | chr19:49413783-49413845   | + | -3.1E-01 | -2.9E-03 | -1.2E-01 | -4.7E-03 |
| DDX19B    | chr16:68907372-68907508   | + | -2.1E-01 | -1.0E-09 | +3.4E-04 | +5.4E-03 |
| AGAP2     | chr12:56408367-56408427   | - | +3.4E-01 | +3.8E-03 | +1.2E-01 | +5.9E-03 |
| EXOC7     | chr17:71598818-71598911   | - | +5.1E-03 | -2.8E-03 | -3.0E-01 | +3.0E-07 |
| KIF1B     | chr1:10308755-10309004    | + | +3.9E-01 | +8.1E-03 | +2.2E-01 | +9.0E-03 |
| EIF4E2    | chr2:233147216-233147295  | + | +1.9E-01 | +1.7E-03 | -5.3E-01 | +7.7E-03 |
| GPHN      | chr14:66379148-66379187   | + | +4.5E-04 | +1.3E-04 | -1.0E-03 | -7.9E-03 |
| RIMS1     | chr6:73031398-73031476    | + | +8.1E-04 | -2.2E-02 | -8.1E-03 | -1.5E-03 |
| SEC24B    | chr4:110622281-110622386  | + | +2.0E-09 | -3.1E-03 | +1.7E-01 | -4.3E-03 |
| C10ORF104 | chr10:73653651-73653820   | + | -2.7E-02 | +7.0E-05 | -5.5E-01 | +1.9E-03 |
| ARHGAP12  | chr10:32182999-32183140   | - | -5.4E-03 | +7.3E-05 | +1.8E-01 | -7.6E-06 |
| HDDC2     | chr6:125661558-125661661  | - | +8.5E-07 | -2.2E-01 | -6.2E-05 | -9.1E-03 |
| FGF1      | chr5:141960450-141960554  | - | -1.3E-02 | +4.3E-02 | +5.9E-03 | +4.6E-03 |
| RNF14     | chr5:141338051-141338579  | + | -5.9E-01 | +5.1E-01 | -2.9E-03 | -4.5E-04 |
| FBXO44    | chr1:11641176-11641272    | + | -2.0E-03 | -1.3E-01 | +8.6E-03 | -1.4E-03 |
| SFXN5     | chr2:73041767-73041885    | - | +1.4E-02 | +2.7E-01 | -7.1E-05 | -5.6E-03 |
| EAPP      | chr14:34068314-34068432   | - | -2.6E-02 | -5.0E-01 | +3.8E-03 | +3.2E-03 |
| TRAPPC1   | chr17:7775548-7775619     | - | +9.9E-03 | +4.8E-01 | -3.6E-02 | +7.6E-03 |
| CAMKK2    | chr12:120215337-120215460 | - | -3.4E-03 | -2.3E-02 | +1.9E-04 | +6.2E-03 |
| MARK3     | chr14:103036245-103036290 | + | +3.8E-03 | -3.7E-03 | +2.0E-01 | -6.9E-04 |
| PXK       | chr3:58381302-58381335    | + | +5.4E-01 | +4.3E-01 | -5.2E-03 | -9.8E-03 |
| KEAP1     | chr19:10460867-10461044   | - | -8.9E-03 | +1.8E-03 | +2.6E-01 | -1.5E-03 |
| FLJ45455  | chr17:11223455-11223551   | + | +2.1E-01 | -1.8E-03 | +7.6E-03 | +9.8E-03 |

**Supplemental Table 5:** Cassette exons predicted by the HJAY array to have splicing differences between human and rhesus cerebellums. Columns ‘upstream junction’, ‘downstream junction’, ‘exon’ and ‘skip junction’ contain MADS+ p values of differential splicing between human and rhesus cerebellums. ‘+’ indicates higher exon inclusion levels in humans. ‘-’ indicates lower exon inclusion levels in humans. ‘NA’ indicates an insufficient number of perfect-match probes targeting orthologous transcripts for between-species comparison of splicing. Exons highlighted in red are true positive HJAY predictions confirmed by RT-PCR. Exons highlighted in blue are false positive HJAY predictions according to RT-PCR analysis. Exons are sorted based on the rankings of statistical significance for splicing differences between species.

| Gene symbol | Exon location (hg18)      | Strand | Upstream junction | Downstream junction | Exon      | Skip junction |
|-------------|---------------------------|--------|-------------------|---------------------|-----------|---------------|
| NRCAM       | chr7:107827115-107827273  | -      | +1.00E-18         | +4.40E-34           | NA        | +2.60E-24     |
| NDRG4       | chr16:57102049-57102088   | +      | -1.60E-25         | -2.50E-24           | -1.10E-30 | -2.40E-06     |
| KIAA0652    | chr11:46642122-46642221   | +      | -8.80E-17         | -2.10E-28           | -2.00E-21 | -2.00E-13     |
| ITGB1       | chr10:33235398-33235496   | -      | -3.20E-08         | NA                  | NA        | -6.90E-40     |
| ZDHC16      | chr10:99203545-99203593   | +      | +3.10E-20         | +1.30E-16           | +5.20E-09 | +5.10E-22     |
| R3HDM2      | chr12:55968906-55968960   | -      | +5.20E-24         | +3.10E-07           | +2.50E-16 | +3.80E-12     |
| HNRNPF      | chr10:43210083-43210142   | -      | NA                | NA                  | +5.40E-07 | +3.10E-20     |
| ZNF207      | chr17:27712599-27712647   | +      | +2.00E-13         | +1.10E-23           | +1.10E-06 | +1.70E-16     |
| UBAP2       | chr9:33953723-33953789    | -      | +3.50E-09         | NA                  | +1.10E-04 | +1.20E-07     |
| FLRT3       | chr20:14257779-14257973   | -      | -3.20E-17         | -9.70E-16           | NA        | -5.50E-16     |
| GPBP1L1     | chr1:45923834-45923879    | -      | +1.20E-02         | +8.00E-08           | +1.20E-07 | +9.60E-06     |
| BEND6       | chr6:56987218-56987282    | +      | +1.60E-25         | NA                  | +2.10E-09 | +1.50E-12     |
| SOS1        | chr2:39069914-39069959    | -      | +5.10E-16         | +6.00E-20           | NA        | +1.80E-10     |
| TUBD1       | chr17:55313036-55313253   | -      | -2.40E-14         | -9.80E-19           | -1.80E-06 | -8.50E-13     |
| IP6K2       | chr3:48705706-48705775    | -      | NA                | -1.20E-10           | -1.10E-10 | -2.20E-13     |
| MUDENG      | chr14:56810714-56810908   | +      | +4.30E-08         | NA                  | +1.10E-04 | +9.50E-21     |
| MFN2        | chr1:11965166-11965234    | +      | +3.70E-09         | +6.20E-20           | +3.50E-15 | +6.30E-06     |
| AP1GBP1     | chr17:32954394-32954430   | -      | +2.40E-15         | NA                  | +4.10E-09 | +9.50E-18     |
| STAU2       | chr8:74783820-74783951    | -      | -1.80E-14         | -7.70E-14           | -1.50E-10 | -2.30E-05     |
| GLMN        | chr1:92504844-92504886    | -      | -4.20E-18         | -1.70E-13           | NA        | -2.70E-06     |
| MORF4L2     | chrX:102826264-102826313  | -      | +3.90E-13         | +5.70E-11           | NA        | +5.60E-09     |
| HNRNPH1     | chr5:178975152-178975202  | -      | +4.20E-02         | +6.40E-14           | +3.40E-04 | +2.90E-25     |
| SIPA1L1     | chr14:71241190-71241253   | +      | -1.30E-12         | -3.20E-06           | -7.80E-08 | -1.50E-18     |
| SNRK        | chr3:43316249-43316311    | +      | -2.40E-22         | +1.10E-01           | NA        | -3.90E-17     |
| DOPEY1      | chr6:83863168-83863261    | +      | NA                | +4.20E-13           | +3.10E-17 | +7.00E-05     |
| UBA2        | chr19:39613320-39613404   | +      | -5.60E-16         | -4.60E-03           | NA        | -6.10E-21     |
| EXD2        | chr14:68745299-68745552   | +      | NA                | -6.50E-23           | NA        | -1.50E-07     |
| KPNA1       | chr3:123659262-123659385  | -      | -2.80E-05         | -1.40E-13           | -3.60E-12 | -1.40E-14     |
| CAMK2D      | chr4:114648840-114648873  | -      | -1.80E-09         | NA                  | -2.50E-27 | -8.30E-03     |
| ANK1        | chr8:41638104-41638239    | -      | -2.10E-02         | -4.80E-05           | +1.10E-13 | +5.40E-03     |
| ABLIM3      | chr5:148600431-148600530  | +      | +2.60E-06         | +7.80E-14           | +4.20E-08 | +2.30E-17     |
| KIAA0802    | chr18:8799445-8799559     | +      | +6.00E-09         | NA                  | NA        | +2.00E-21     |
| ANUBL1      | chr10:45468437-45468513   | -      | NA                | +1.70E-17           | NA        | +7.10E-12     |
| ZMYND11     | chr10:233850-233945       | +      | -3.00E-10         | -7.00E-21           | NA        | -5.10E-06     |
| PKD1        | chr16:2082955-2083095     | -      | +4.00E-04         | +3.60E-17           | NA        | +3.20E-05     |
| FAM118B     | chr11:125604329-125604398 | +      | +1.20E-09         | +2.80E-18           | NA        | +4.90E-06     |

|         |                           |   |           |           |           |           |
|---------|---------------------------|---|-----------|-----------|-----------|-----------|
| MAP2    | chr2:210296563-210296656  | + | NA        | -5.30E-25 | -2.40E-06 | -4.50E-03 |
| MAP7    | chr6:136746501-136746612  | - | +7.70E-16 | +1.90E-01 | NA        | +3.50E-07 |
| HNRPDL  | chr4:83565739-83565844    | - | -2.30E-03 | -4.60E-08 | -1.90E-14 | -1.20E-15 |
| SON     | chr21:33866726-33866806   | + | NA        | -3.60E-13 | -3.40E-14 | -7.20E-08 |
| DCLK1   | chr13:35260348-35260422   | - | -3.30E-06 | -3.60E-09 | -1.40E-05 | -3.00E-03 |
| WNK1    | chr12:850691-850775       | + | -1.60E-07 | -8.00E-08 | -1.10E-18 | -1.10E-05 |
| UBE3A   | chr15:23205327-23205447   | - | NA        | +7.50E-03 | +1.20E-09 | +1.30E-11 |
| GPBP1L1 | chr1:45923834-45923879    | - | +1.20E-02 | +8.00E-08 | +1.20E-07 | +9.60E-06 |
| PFKM    | chr12:46805374-46805612   | + | NA        | -6.00E-06 | NA        | -2.50E-16 |
| CRYZL1  | chr21:33935354-33935481   | - | NA        | +5.20E-11 | NA        | +7.30E-11 |
| CTNND1  | chr11:57318057-57318129   | + | NA        | -4.80E-06 | -1.00E-02 | -2.70E-25 |
| KLHL24  | chr3:184843961-184844024  | + | NA        | +2.70E-07 | +1.20E-03 | +2.60E-08 |
| TRPC1   | chr3:143937910-143938065  | + | -5.90E-07 | +1.40E-06 | +1.30E-08 | +1.90E-21 |
| ACHP    | chr7:156173484-156173646  | - | -8.40E-05 | +8.70E-02 | -1.90E-03 | -2.60E-27 |
| G3BP2   | chr4:76806138-76806257    | - | +9.60E-09 | +2.60E-02 | +1.80E-01 | +1.10E-04 |
| ZNF484  | chr9:94677117-94677162    | - | NA        | -4.80E-09 | NA        | -1.00E-13 |
| NKTR    | chr3:42643695-42643723    | + | NA        | +6.70E-05 | +1.10E-07 | +1.90E-14 |
| PELI1   | chr2:64185338-64185468    | - | +1.10E-05 | +9.80E-09 | +1.60E-04 | +1.70E-07 |
| ABLIM1  | chr10:116212793-116212913 | - | -2.30E-01 | -2.80E-06 | -6.90E-06 | -1.70E-14 |
| 4-Sep   | chr17:53959291-53959338   | - | -7.10E-03 | +2.20E-23 | -4.00E-03 | +8.30E-18 |
| RIMS1   | chr6:73027128-73027191    | + | +1.10E-12 | +9.00E-02 | +1.60E-01 | +6.10E-20 |
| ST7     | chr7:116649212-116649352  | + | +8.50E-02 | +6.00E-12 | +1.90E-04 | +4.70E-17 |
| CAMTA1  | chr1:7738284-7738315      | + | -6.30E-03 | -9.40E-05 | -2.80E-09 | -1.90E-09 |
| C1QDC1  | chr12:30777829-30777912   | - | -4.70E-05 | -2.80E-07 | -2.50E-09 | -8.70E-09 |
| PHF14   | chr7:10988523-10989311    | + | -1.40E-16 | -5.80E-09 | -1.20E-07 | -7.50E-03 |
| DIS3    | chr13:72253427-72253495   | - | +2.40E-12 | NA        | -4.10E-02 | +2.90E-17 |
| MAP3K4  | chr6:161439299-161439449  | + | NA        | +7.60E-10 | NA        | +2.90E-04 |
| TXNDC11 | chr16:11732001-11732131   | - | NA        | -8.00E-09 | -7.30E-03 | -2.20E-06 |
| SNAP25  | chr20:10172622-10172682   | + | NA        | +8.00E-13 | +1.30E-03 | +5.20E-06 |
| LZTR1   | chr22:19671792-19671872   | + | -4.30E-07 | -1.80E-07 | -6.70E-03 | -1.50E-08 |
| LRIG1   | chr3:66534722-66534794    | - | NA        | -5.90E-04 | -1.20E-16 | -4.50E-03 |
| MAPKAP1 | chr9:127308409-127308517  | - | -9.20E-14 | -1.80E-02 | -2.20E-06 | -2.70E-09 |
| SEZ6L2  | chr16:29791526-29791565   | - | +2.00E-07 | +5.60E-07 | +1.90E-09 | +4.00E-04 |
| TDP1    | chr14:89511877-89511912   | + | +1.00E-12 | +2.70E-06 | NA        | +1.80E-06 |
| NUMA1   | chr11:71401094-71401136   | - | -4.80E-10 | NA        | -6.80E-08 | -7.20E-06 |
| DENND1A | chr9:125571613-125571663  | - | -2.80E-07 | NA        | NA        | -8.30E-03 |
| MPZL1   | chr1:166011924-166012027  | + | +1.10E-13 | -8.00E-14 | -6.20E-14 | -2.00E-07 |
| DIS3    | chr13:72252984-72253142   | - | -2.90E-17 | NA        | NA        | -4.70E-04 |
| C18ORF1 | chr18:32654928-32655090   | - | -1.30E-15 | NA        | NA        | -3.00E-03 |
| AMOTL1  | chr11:94167824-94167974   | + | NA        | -1.90E-03 | NA        | -1.90E-17 |
| MAX     | chr14:64613814-64613899   | - | NA        | NA        | +6.00E-06 | +1.20E-07 |
| SLC3A2  | chr11:62408036-62408160   | + | -2.30E-08 | NA        | NA        | -7.10E-09 |
| RDH11   | chr14:67226681-67226891   | - | +1.50E-11 | NA        | NA        | +1.10E-05 |
| ARHGAP4 | chrX:152839743-152839806  | - | -8.30E-06 | +2.50E-02 | -1.10E-03 | -1.10E-08 |
| ACAA1   | chr3:38145784-38145883    | - | NA        | +1.20E-05 | NA        | +2.70E-12 |
| ETFA    | chr15:74363152-74363221   | - | +3.60E-09 | +7.30E-11 | NA        | +1.30E-04 |
| MBD1    | chr18:46055737-46055812   | - | +7.20E-12 | +6.40E-06 | +1.00E-07 | +4.20E-04 |
| CEP350  | chr1:178226264-178226379  | + | +1.50E-06 | +3.00E-04 | +2.30E-05 | +4.50E-08 |
| ANKS1B  | chr12:97725752-97725824   | - | -1.20E-03 | -8.60E-05 | -5.30E-12 | -3.30E-09 |
| DTNA    | chr18:30672055-30672133   | + | NA        | +3.30E-01 | -1.90E-13 | -5.00E-12 |

|         |                           |   |           |           |           |           |
|---------|---------------------------|---|-----------|-----------|-----------|-----------|
| CAMK2G  | chr10:75257852-75257885   | - | NA        | -1.70E-07 | -1.50E-11 | -9.10E-04 |
| GON4L   | chr1:154012809-154012896  | - | +3.90E-12 | +8.90E-05 | NA        | +2.20E-07 |
| YIPF3   | chr6:43591321-43591417    | - | +2.60E-11 | -2.60E-06 | NA        | +1.20E-05 |
| NAPB    | chr20:23325708-23325819   | - | NA        | -1.40E-01 | -8.00E-08 | -1.00E-16 |
| PMPCB   | chr7:102735278-102735391  | + | NA        | -3.20E-06 | NA        | -8.40E-12 |
| RAD51C  | chr17:54138237-54138382   | + | NA        | +4.60E-14 | NA        | +5.80E-03 |
| BCAS1   | chr20:52016851-52017019   | - | -5.00E-03 | -3.90E-10 | NA        | -7.80E-05 |
| CLIP1   | chr12:121401610-121401643 | - | +2.30E-06 | +5.30E-10 | +9.20E-04 | +5.10E-06 |
| TTC17   | chr11:43414289-43414460   | + | +3.30E-02 | +3.50E-10 | +1.20E-02 | +6.20E-05 |
| ASNS    | chr7:97337025-97337061    | - | +3.30E-06 | NA        | NA        | +7.20E-06 |
| ASNS    | chr7:97338966-97339244    | - | -8.90E-06 | NA        | NA        | -3.30E-06 |
| SNAP91  | chr6:84359619-84359697    | - | +3.80E-01 | NA        | -1.80E-04 | -1.70E-19 |
| SF3B3   | chr16:69142053-69142082   | + | -5.50E-12 | -2.50E-05 | -6.10E-05 | -1.30E-03 |
| HERPUD1 | chr16:55526816-55526888   | + | +5.00E-04 | NA        | -4.50E-01 | +2.30E-07 |
| ST3GAL6 | chr3:99975453-99975517    | + | +1.40E-04 | +5.00E-03 | +4.30E-06 | +3.90E-11 |
| SLC20A2 | chr8:42447741-42447876    | - | -4.50E-01 | -3.60E-05 | -7.10E-05 | -3.40E-19 |
| AGFG1   | chr2:228104050-228104170  | + | +1.10E-12 | +1.90E-05 | +2.60E-01 | +4.60E-08 |
| GSTM3   | chr1:110083977-110084053  | - | -4.60E-10 | NA        | NA        | -2.40E-04 |
| DLG1    | chr3:198361010-198361064  | - | -3.80E-04 | +1.70E-26 | -2.80E-02 | -2.70E-10 |
| MAPT    | chr17:41416380-41417133   | + | -1.20E-04 | -2.60E-12 | NA        | -1.60E-03 |
| USP37   | chr2:219052616-219052682  | - | +1.70E-09 | +2.50E-03 | +3.40E-06 | +9.00E-07 |
| SEZ6L   | chr22:25099416-25099449   | + | -1.20E-04 | -2.80E-10 | -5.10E-07 | -7.90E-04 |
| MGEA5   | chr10:103549988-103550147 | - | +1.20E-03 | NA        | NA        | +1.70E-12 |
| GRM3    | chr7:86232257-86232865    | + | NA        | +3.40E-05 | +1.10E-01 | +1.30E-08 |
| MBNL1   | chr3:153633195-153633399  | + | +2.90E-11 | +5.60E-01 | +3.00E-04 | +8.80E-05 |
| PDXK    | chr21:43988032-43988116   | + | +1.20E-13 | NA        | +5.30E-04 | +1.40E-03 |
| FAM107A | chr3:58531092-58531190    | - | -6.70E-03 | NA        | NA        | -1.20E-10 |
| TRIT1   | chr1:40090989-40091135    | - | NA        | -1.10E-06 | -5.60E-02 | -3.60E-11 |
| RPP14   | chr3:58271075-58271173    | + | -9.40E-03 | NA        | -7.60E-10 | -2.70E-09 |
| PHF15   | chr5:133940356-133940485  | + | -1.50E-05 | -1.30E-08 | -1.10E-04 | -5.10E-05 |
| ANKRD6  | chr6:90388361-90388466    | + | +8.50E-09 | +2.40E-02 | +1.10E-03 | +5.50E-10 |
| ZNF655  | chr7:98998746-98998825    | + | NA        | +6.60E-11 | NA        | +4.30E-04 |
| C1ORF12 | chr1:53457126-53457183    | - | +7.10E-09 | +4.60E-11 | -2.30E-03 | +4.60E-03 |
| ARIH2   | chr3:48957572-48957618    | + | -1.20E-01 | -1.40E-06 | -4.00E-06 | -3.50E-10 |
| CADM1   | chr11:114585503-114585587 | - | -1.80E-02 | -6.20E-06 | -2.70E-04 | -2.20E-13 |
| SSBP2   | chr5:80947047-80947132    | - | -5.00E-01 | +1.30E-15 | +2.40E-01 | +1.30E-09 |
| MLLT10  | chr10:21886555-21886759   | + | +7.50E-02 | +1.10E-16 | -3.10E-01 | +9.10E-06 |
| PITPNM3 | chr17:6369399-6369507     | - | +1.20E-10 | +6.10E-03 | +2.50E-02 | +7.00E-04 |
| APC     | chr5:112101948-112102056  | + | NA        | +4.10E-12 | +1.30E-01 | +3.60E-06 |
| ZNF706  | chr8:102283736-102283851  | - | NA        | +7.90E-11 | NA        | +5.00E-04 |
| PKP4    | chr2:159098195-159098292  | + | +1.10E-02 | +7.40E-03 | -2.10E-01 | +3.90E-15 |
| ATP2B4  | chr1:201968973-201969081  | + | -1.30E-06 | NA        | -1.60E-03 | -1.10E-07 |
| CELSR2  | chr1:109609012-109609154  | + | -2.70E-05 | +1.10E-13 | NA        | -4.70E-15 |
| TSC22D2 | chr3:151638674-151638831  | + | NA        | NA        | -3.60E-03 | -5.40E-12 |
| PCCB    | chr3:137528686-137528787  | + | -1.60E-04 | NA        | NA        | -7.00E-10 |
| ANK3    | chr10:61498400-61506212   | - | -2.50E-02 | -5.10E-07 | -1.50E-08 | -1.00E-04 |
| PSME4   | chr2:53954979-53955135    | - | +2.80E-03 | NA        | -5.50E-01 | +2.20E-04 |
| SSX2IP  | chr1:84909459-84909579    | - | -2.40E-07 | NA        | -5.00E-02 | -3.00E-10 |
| EIF3H   | chr8:117815696-117815744  | - | -1.10E-03 | NA        | -1.40E-02 | -2.10E-16 |
| ADD1    | chr4:2898166-2898200      | + | -6.30E-03 | +7.80E-02 | -1.70E-01 | -3.10E-23 |

|          |                           |   |           |           |           |           |
|----------|---------------------------|---|-----------|-----------|-----------|-----------|
| CREBBP   | chr16:3781982-3782096     | - | -3.30E-07 | -5.10E-04 | -6.40E-06 | -8.00E-04 |
| ANK1     | chr8:41638104-41638239    | - | -2.10E-02 | -4.80E-05 | +1.10E-13 | +5.40E-03 |
| MAP4     | chr3:47885707-47885821    | - | +8.10E-03 | +9.10E-03 | -4.50E-01 | +1.10E-09 |
| ANUBL1   | chr10:45455694-45455875   | - | NA        | +2.30E-09 | NA        | +2.10E-04 |
| RBM15    | chr1:110689683-110689794  | + | NA        | -1.40E-12 | NA        | -2.20E-03 |
| OPA1     | chr3:194826574-194826685  | + | +2.70E-02 | +2.50E-01 | -3.30E-12 | -4.00E-13 |
| ZMYND11  | chr10:257134-257296       | + | -1.40E-05 | +3.20E-01 | -1.20E-09 | -2.00E-07 |
| GFPT1    | chr2:69434894-69434948    | - | -1.60E-05 | -1.10E-05 | -2.10E-06 | -2.40E-03 |
| AGFG1    | chr2:228105097-228105169  | + | NA        | -4.10E-03 | -7.60E-10 | -1.90E-05 |
| PXMP3    | chr8:78063097-78063129    | - | NA        | +2.20E-09 | NA        | +6.00E-03 |
| AKAP8L   | chr19:15370440-15370577   | - | -5.20E-12 | -1.10E-02 | -3.80E-03 | -4.40E-04 |
| FLNB     | chr3:58113474-58113544    | + | -1.30E-07 | NA        | -1.30E-06 | -1.20E-03 |
| KIAA0226 | chr3:198902341-198902416  | - | NA        | NA        | +8.50E-05 | +1.60E-03 |
| LPHN3    | chr4:62461031-62461070    | + | +6.20E-02 | -1.30E-07 | NA        | -2.30E-11 |
| SPP1     | chr4:89120568-89120610    | + | NA        | -3.00E-05 | NA        | -5.50E-08 |
| DCLK2    | chr4:151339629-151339680  | + | -8.10E-03 | -2.80E-01 | -2.30E-14 | -1.30E-05 |
| LSM14B   | chr20:60136035-60136152   | + | +6.20E-10 | -2.50E-01 | +3.30E-07 | +3.50E-05 |
| MAGI1    | chr3:65408736-65408772    | - | +1.00E-01 | +5.90E-10 | +9.00E-06 | +1.00E-04 |
| GFM1     | chr3:159850487-159850544  | + | +3.10E-07 | +1.40E-03 | +3.30E-01 | +3.10E-07 |
| PSMB7    | chr9:126207416-126207532  | - | +5.20E-01 | +2.30E-15 | NA        | +7.30E-03 |
| TIA1     | chr2:70305963-70306029    | - | -1.70E-01 | -2.10E-01 | -2.80E-14 | -2.50E-05 |
| UBE2D2   | chr5:138922012-138922176  | + | -6.40E-04 | NA        | NA        | -1.50E-07 |
| ABI2     | chr2:203967667-203967814  | + | +3.80E-05 | +2.10E-03 | +2.00E-01 | +9.00E-07 |
| ELMO2    | chr20:44455574-44455647   | - | -4.60E-03 | NA        | -5.90E-01 | -1.70E-13 |
| ARID1B   | chr6:157537672-157537831  | + | -3.10E-01 | -5.50E-09 | -3.00E-06 | -2.90E-05 |
| MKRN1    | chr7:139820649-139820758  | - | NA        | -9.00E-05 | NA        | -6.00E-08 |
| HIPK3    | chr11:33326287-33326350   | + | -1.00E-05 | NA        | -3.80E-05 | -5.60E-06 |
| SORBS1   | chr10:97125719-97125803   | - | +2.60E-01 | +2.40E-05 | +2.40E-01 | +3.90E-15 |
| PDE6D    | chr2:232310140-232310246  | - | NA        | +3.70E-06 | +6.20E-04 | +1.30E-04 |
| MAP4K4   | chr2:101854387-101854579  | + | -3.50E-04 | -3.20E-05 | -7.10E-04 | -2.90E-07 |
| ANK1     | chr8:41638550-41638616    | - | +8.00E-16 | -5.70E-03 | NA        | +5.40E-03 |
| SLC24A2  | chr9:19587226-19587277    | - | -1.10E-07 | -9.80E-06 | NA        | -4.10E-03 |
| ZC3H14   | chr14:88132830-88132905   | + | +4.50E-01 | -1.40E-12 | -9.20E-04 | -6.30E-03 |
| SENP6    | chr6:76389186-76389294    | + | NA        | NA        | -2.50E-08 | -1.50E-06 |
| NPTN     | chr15:71676415-71676763   | - | -2.40E-02 | -1.80E-02 | -1.00E-04 | -1.40E-11 |
| PARP6    | chr15:70330239-70330349   | - | +8.30E-07 | +1.50E-02 | +1.70E-03 | +3.20E-08 |
| C10ORF4  | chr10:120443203-120443251 | - | NA        | NA        | -3.30E-06 | -9.00E-06 |
| CADM2    | chr3:86111003-86111123    | + | +5.40E-04 | NA        | +7.80E-02 | +2.80E-07 |
| BRPF1    | chr3:9832757-9832886      | + | NA        | NA        | -1.20E-08 | -7.60E-03 |
| MLLT6    | chr17:34117264-34117319   | + | -1.30E-07 | -1.70E-05 | +1.00E-03 | +1.60E-09 |
| MAGOH    | chr1:53471801-53471912    | - | -6.10E-04 | -7.30E-09 | -5.10E-02 | -7.40E-07 |
| TFIP11   | chr22:25236029-25236247   | - | +2.00E-10 | -9.40E-04 | NA        | +7.00E-06 |
| RBM23    | chr14:22448531-22448644   | - | +2.70E-12 | -2.30E-02 | NA        | +1.20E-03 |
| CLK4     | chr5:177981999-177982066  | - | +1.50E-10 | NA        | +1.50E-01 | +9.90E-05 |
| PTPRK    | chr6:128854569-128854687  | - | -1.60E-05 | NA        | NA        | -4.10E-06 |
| ACAA1    | chr3:38150446-38150504    | - | -4.20E-01 | +5.00E-08 | +2.30E-01 | +4.60E-12 |
| C18ORF2  | chr18:42073968-42074151   | + | +4.40E-01 | -6.50E-03 | -8.00E-08 | -5.40E-09 |
| ANK2     | chr4:114513137-114513230  | + | -4.50E-01 | -2.00E-07 | -4.40E-03 | -2.70E-05 |
| WDR23    | chr14:23656716-23656781   | + | +9.10E-02 | +2.20E-03 | +4.80E-04 | +5.70E-04 |
| MORF4L2  | chrX:102820082-102820184  | - | -5.60E-09 | +3.70E-01 | -2.50E-03 | -2.50E-08 |

|           |                           |   |           |           |           |           |
|-----------|---------------------------|---|-----------|-----------|-----------|-----------|
| PIK3CB    | chr3:139905974-139906025  | - | -3.10E-01 | NA        | -3.20E-05 | -4.60E-11 |
| ASB8      | chr12:46830136-46830190   | - | NA        | +1.20E-05 | NA        | +1.60E-05 |
| ZFYVE9    | chr1:52504914-52505091    | + | -7.10E-06 | +4.00E-18 | -1.50E-05 | +1.60E-05 |
| SERGEF    | chr11:17937592-17937759   | - | -3.20E-06 | -3.30E-05 | NA        | -2.70E-05 |
| CPNE1     | chr20:33710265-33710318   | - | +4.90E-03 | +2.30E-02 | NA        | +6.00E-10 |
| FMR1      | chrX:146827309-146827372  | + | -1.20E-05 | -2.50E-04 | -7.90E-05 | -7.00E-04 |
| DAZAP1    | chr19:1376876-1376959     | + | +5.10E-01 | +6.60E-06 | +5.60E-03 | +2.40E-05 |
| AGAP2     | chr12:56408367-56408427   | - | +2.30E-01 | +3.80E-03 | +3.10E-03 | +1.70E-11 |
| GRIN1     | chr9:139162424-139162487  | + | -4.00E-02 | -1.00E-07 | -1.00E-03 | -4.40E-04 |
| TTBK2     | chr15:40907417-40907522   | - | +1.70E-03 | +4.20E-05 | NA        | +1.40E-03 |
| HNRNP     | chr4:83495071-83495178    | - | -1.20E-03 | -1.40E-04 | -2.60E-06 | -1.10E-03 |
| C12ORF3   | chr12:111009869-111009988 | - | -3.90E-08 | +1.80E-02 | NA        | -7.80E-03 |
| KIAA0652  | chr11:46596450-46596501   | + | +9.20E-08 | -2.40E-08 | NA        | +7.90E-06 |
| KLHL8     | chr4:88323378-88323565    | - | NA        | -2.70E-02 | +9.40E-04 | +3.00E-09 |
| RAB5A     | chr3:19987043-19987213    | + | NA        | -6.50E-05 | -1.90E-03 | -7.90E-07 |
| LRSAM1    | chr9:129293314-129293395  | + | +2.00E-04 | NA        | +1.90E-03 | +7.30E-06 |
| CSDE1     | chr1:115085670-115085817  | - | +2.70E-04 | NA        | -3.50E-01 | +8.50E-03 |
| TTC8      | chr14:88377521-88377611   | + | -8.80E-04 | -4.80E-02 | -2.00E-02 | -5.50E-12 |
| SEC24B    | chr4:110622281-110622386  | + | NA        | -8.90E-06 | -9.90E-03 | -6.10E-06 |
| CAPRIN2   | chr12:30755939-30755983   | - | NA        | NA        | -8.30E-06 | -5.50E-03 |
| USP10     | chr16:83295846-83295967   | + | -6.40E-07 | NA        | NA        | -3.40E-03 |
| R3HDM2    | chr12:55969058-55969090   | - | +1.90E-14 | -3.80E-12 | +1.00E-06 | -1.60E-03 |
| MBNL1     | chr3:153658608-153658672  | + | +3.00E-01 | NA        | -1.30E-09 | -6.90E-05 |
| DLG1      | chr3:198280486-198280528  | - | -4.20E-04 | +3.80E-01 | -3.00E-07 | -8.40E-06 |
| PHF201    | chr8:133880522-133880600  | + | -8.20E-02 | -3.50E-07 | NA        | -3.60E-03 |
| WAC       | chr10:28924667-28924976   | + | NA        | +2.20E-03 | +1.40E-03 | +1.80E-06 |
| CADPS     | chr3:62442437-62442584    | - | +4.10E-01 | -2.20E-04 | +3.10E-01 | -6.90E-12 |
| PABPC4    | chr1:39802094-39802181    | - | -3.20E-03 | -4.00E-05 | -1.20E-02 | -7.70E-03 |
| NDRG3     | chr20:34716617-34716656   | - | +1.70E-10 | NA        | -1.50E-01 | +1.30E-04 |
| PCM1      | chr8:17841830-17841947    | + | -1.70E-01 | -4.20E-07 | -4.70E-05 | -6.30E-03 |
| RBM9      | chr22:34504017-34504071   | - | +2.90E-04 | NA        | +3.70E-02 | +2.80E-05 |
| ABCA3     | chr16:2298451-2298625     | - | +6.40E-05 | NA        | NA        | +1.20E-04 |
| BRSK2     | chr11:1425603-1425669     | + | +2.10E-02 | -2.70E-04 | -9.30E-04 | -3.20E-07 |
| ARHGAP2   | chr5:142566955-142567066  | + | NA        | +7.40E-04 | -2.90E-01 | +2.20E-05 |
| ATE1      | chr10:123671853-123671916 | - | +6.00E-07 | +3.30E-05 | +3.70E-01 | +2.90E-04 |
| EIF4ENIF1 | chr22:30176274-30176346   | - | +3.80E-02 | +1.80E-04 | +5.90E-02 | +7.60E-05 |
| PLA2G6    | chr22:36874445-36874576   | - | NA        | -5.50E-05 | NA        | -1.90E-03 |
| USP3      | chr15:61616276-61616408   | + | -1.20E-04 | +8.70E-03 | NA        | -6.60E-06 |
| ZMYM3     | chrX:70389163-70389849    | - | +2.80E-01 | +4.40E-06 | +3.00E-02 | +1.70E-03 |
| FAM40A    | chr1:110383968-110384082  | + | NA        | -7.10E-04 | NA        | -2.70E-05 |
| FAM49B    | chr8:130961803-130961886  | - | -4.00E-02 | +7.40E-09 | -1.70E-07 | -2.70E-09 |
| VPS53     | chr17:511798-511885       | - | NA        | +1.70E-03 | NA        | +2.00E-04 |
| DGUOK     | chr2:74037759-74037875    | + | -7.90E-03 | NA        | NA        | -2.40E-05 |
| DMXL2     | chr15:49539086-49539149   | - | NA        | -3.00E-01 | +2.40E-03 | +1.60E-05 |
| LONRF1    | chr8:12639151-12639240    | - | +1.10E-03 | +1.00E-04 | +4.90E-01 | +2.00E-05 |
| SFXN5     | chr2:73041767-73041885    | - | NA        | NA        | -2.30E-05 | -9.20E-04 |
| RAD1      | chr5:34949331-34949440    | - | NA        | -1.20E-03 | NA        | -1.10E-05 |
| YWHAE     | chr17:1219752-1219785     | - | -3.70E-02 | -4.40E-01 | -6.10E-10 | -7.90E-04 |
| HDAC9     | chr7:18635497-18635629    | + | -4.00E-02 | -3.90E-04 | -3.00E-03 | -3.40E-05 |
| WDR1      | chr4:9714617-9714708      | - | -3.30E-02 | NA        | +8.70E-03 | +2.60E-06 |

|          |                           |   |           |           |           |           |
|----------|---------------------------|---|-----------|-----------|-----------|-----------|
| SRPK2    | chr7:104553464-104553557  | - | -4.80E-01 | -2.20E-04 | -7.80E-09 | -5.00E-04 |
| ITSN1    | chr21:34120991-34121037   | + | -7.00E-05 | +4.80E-01 | -2.50E-01 | -3.20E-09 |
| FLJ45455 | chr17:11223455-11223551   | + | +1.20E-02 | -4.00E-04 | +2.10E-03 | +1.70E-13 |
| FAM13B   | chr5:137320064-137320130  | - | -3.50E-02 | -4.70E-04 | NA        | -6.10E-06 |
| MEGF11   | chr15:63986016-63986062   | - | NA        | -7.80E-05 | -3.40E-02 | -8.70E-04 |
| C5ORF33  | chr5:36244483-36244549    | - | NA        | -1.80E-05 | -1.40E-03 | -4.00E-03 |
| AUTS2    | chr7:69876949-69877021    | + | -1.60E-02 | -3.80E-01 | -8.40E-03 | -2.10E-11 |
| TMEM50   | chr1:25539551-25539657    | + | -3.40E-03 | -1.10E-15 | +5.80E-04 | +1.70E-03 |
| ARRB2    | chr17:4566190-4566235     | + | -1.10E-03 | -8.40E-02 | -1.60E-03 | -8.30E-05 |
| MAP7D2   | chrX:19983772-19983838    | - | NA        | +1.50E-01 | +6.70E-03 | +9.40E-07 |
| MBD1     | chr18:46056202-46056349   | - | -4.90E-02 | NA        | +6.20E-03 | +2.70E-09 |
| TMEM85   | chr15:32307921-32308082   | + | +2.90E-11 | -2.10E-03 | +1.30E-01 | -2.40E-09 |
| FLJ45455 | chr17:11395937-11395994   | + | NA        | +2.70E-03 | NA        | +4.00E-04 |
| ARMC8    | chr3:139430449-139430542  | + | +2.20E-05 | NA        | +1.70E-03 | +6.80E-03 |
| KCNJ3    | chr2:155274360-155274577  | + | +9.50E-06 | +2.30E-01 | -7.80E-03 | -4.30E-17 |
| NASP     | chr1:45838643-45838716    | + | NA        | NA        | -3.30E-03 | -1.30E-05 |
| SEC24C   | chr10:75189385-75189558   | + | -1.30E-01 | NA        | +4.30E-04 | +5.00E-03 |
| MAP4     | chr3:47885707-47885821    | - | +8.10E-03 | +9.10E-03 | -4.50E-01 | +1.10E-09 |
| GPM6B    | chrX:13735689-13735809    | - | -1.20E-01 | -2.40E-06 | -1.00E-01 | -2.20E-04 |
| XPA      | chr9:99484302-99484533    | - | NA        | -3.60E-03 | NA        | -1.10E-04 |
| TMEM10   | chr7:12220351-12220545    | + | NA        | -1.10E-03 | NA        | -1.30E-04 |
| TRIP12   | chr2:230433365-230433491  | - | +4.50E-02 | +1.20E-03 | +6.10E-03 | +1.40E-05 |
| CTNNB1   | chr3:41240684-41240816    | + | -4.40E-01 | -8.10E-02 | -1.40E-08 | -6.20E-04 |
| HMGXB4   | chr22:33988315-33988414   | + | NA        | NA        | -7.90E-04 | -8.50E-04 |
| VPS24    | chr2:86622885-86622946    | - | -9.70E-05 | +3.10E-02 | NA        | -1.80E-06 |
| OSBPL6   | chr2:178945098-178945206  | + | -4.20E-04 | -8.90E-02 | -2.90E-04 | -1.20E-04 |
| MDM2     | chr12:67493600-67493675   | + | +1.10E-03 | NA        | +4.30E-01 | +3.70E-07 |
| ASAP1    | chr8:131443097-131443199  | - | NA        | +4.40E-03 | NA        | +1.90E-04 |
| PABPC4   | chr1:39802094-39802181    | - | -3.20E-03 | -4.00E-05 | -1.20E-02 | -7.70E-03 |
| SLC4A7   | chr3:27447792-27448164    | - | -3.40E-03 | NA        | NA        | -4.50E-04 |
| FAM126B  | chr2:201618463-201618561  | - | -3.90E-13 | NA        | +4.00E-05 | +1.60E-03 |
| HNRNPL   | chr19:44024092-44024162   | - | -4.40E-02 | -8.80E-02 | -5.70E-06 | -3.70E-04 |
| CPEB2    | chr4:14619059-14619149    | + | NA        | +4.40E-01 | -7.00E-07 | -1.30E-03 |
| RUNX1T1  | chr8:93143949-93144113    | - | -4.40E-02 | +1.80E-03 | -6.10E-09 | -2.30E-04 |
| NCOR1    | chr17:15931210-15931384   | - | -9.20E-03 | -2.20E-01 | -2.30E-03 | -3.60E-06 |
| SFRS2    | chr17:72243448-72243552   | - | +6.50E-04 | +1.40E-08 | -6.40E-07 | +7.30E-03 |
| RNF38    | chr9:36380463-36380613    | - | -2.80E-06 | +8.90E-05 | +7.90E-02 | +4.10E-06 |
| FBXW11   | chr5:171317205-171317307  | - | -1.60E-04 | +7.60E-03 | -8.50E-07 | -8.30E-03 |
| DNAJC16  | chr1:15728169-15728354    | + | NA        | NA        | -7.40E-04 | -7.90E-03 |
| RIMS1    | chr6:73040772-73040856    | + | +4.30E-04 | -3.10E-01 | -6.80E-05 | -1.80E-11 |
| MYEF2    | chr15:46231722-46231773   | - | -5.70E-04 | -1.70E-03 | -2.20E-01 | -3.40E-04 |
| RPS6KC1  | chr1:211312834-211312951  | + | -4.40E-03 | NA        | -1.70E-02 | -2.00E-04 |
| CLTA     | chr9:36199263-36199317    | + | +1.90E-04 | NA        | -2.90E-01 | +1.70E-05 |
| UHRF1BP  | chr12:99046488-99046634   | - | +3.00E-01 | +4.50E-03 | +1.80E-02 | +2.70E-05 |
| UNQ1887  | chr12:119713654-119713743 | - | +2.90E-05 | -1.50E-01 | +4.00E-01 | +9.70E-08 |
| AFF4     | chr5:132301239-132301331  | - | NA        | NA        | -1.70E-04 | -3.30E-03 |
| PKIB     | chr6:123037921-123037988  | + | NA        | +3.60E-03 | NA        | +7.10E-04 |
| SLC26A10 | chr12:56294565-56294655   | + | -2.50E-04 | +2.20E-01 | NA        | -3.50E-04 |
| HACL1    | chr3:15591487-15591593    | - | -2.50E-02 | -1.80E-04 | -4.40E-02 | -2.70E-05 |
| XRN2     | chr20:21254916-21255044   | + | -3.80E-01 | +1.80E-03 | +1.10E-01 | +2.50E-07 |



|         |                           |   |           |           |           |           |
|---------|---------------------------|---|-----------|-----------|-----------|-----------|
| FAM120A | chr9:95360683-95360818    | + | +1.10E-04 | +4.90E-02 | +2.80E-01 | +9.00E-05 |
| MYO9A   | chr15:69972359-69972572   | - | -2.30E-04 | +6.00E-01 | -1.40E-05 | -2.20E-03 |
| HNRNPA2 | chr7:26197200-26197273    | - | NA        | +2.00E-04 | -1.70E-03 | +4.50E-05 |
| FSD1L   | chr9:107263621-107263717  | + | NA        | -2.60E-03 | NA        | -9.90E-03 |
| VEZT    | chr12:94176151-94176189   | + | -2.40E-01 | NA        | -9.40E-03 | -1.10E-04 |
| BCAS3   | chr17:56820760-56820851   | + | NA        | -1.20E-03 | -7.80E-02 | -6.40E-04 |
| SRPX    | chrX:37898658-37898780    | - | +6.40E-01 | -1.70E-01 | +8.50E-03 | +8.20E-03 |
| HECW1   | chr7:43120280-43120515    | + | +2.50E-01 | NA        | -2.80E-04 | -2.40E-05 |
| ARFIP2  | chr11:6458128-6458229     | - | +3.10E-05 | -5.50E-07 | -6.20E-03 | +6.80E-05 |
| FBXW11  | chr5:171273951-171274014  | - | +7.60E-03 | +3.70E-04 | +2.90E-01 | +3.20E-03 |
| SPATS2L | chr2:201012089-201012296  | + | NA        | +1.00E-02 | +6.40E-03 | +8.80E-03 |
| EI24    | chr11:124956316-124956428 | + | +4.00E-01 | -2.80E-07 | -3.40E-01 | -8.20E-04 |
| MSRA    | chr8:9991163-9991238      | + | +3.70E-06 | +3.00E-01 | -9.60E-02 | +5.60E-05 |
| FAM179B | chr14:44547865-44548098   | + | -1.20E-04 | NA        | +1.70E-07 | -3.40E-03 |
| C18ORF1 | chr18:13633357-13633411   | + | -1.80E-10 | +3.90E-05 | -2.70E-04 | +4.10E-04 |
| RELA    | chr11:65185983-65186135   | - | NA        | +4.10E-03 | -1.80E-03 | +2.90E-05 |
| ITPR2   | chr12:26834356-26834427   | - | +6.60E-04 | NA        | -5.30E-01 | +4.40E-05 |
| NFIA    | chr1:61621496-61621625    | + | -6.70E-06 | -1.10E-04 | +4.10E-03 | +3.70E-06 |
| WDFY3   | chr4:85867037-85867088    | - | -4.40E-02 | +1.50E-03 | -8.60E-06 | -6.10E-04 |
| CADM1   | chr11:114574335-114574368 | - | -6.20E-06 | -8.80E-07 | +5.50E-04 | +7.50E-08 |
| SFRS7   | chr2:38826789-38826825    | - | NA        | +5.00E-05 | +2.20E-01 | +6.90E-03 |
| ARRB2   | chr17:4566016-4566077     | + | -1.60E-01 | -1.10E-03 | +9.20E-06 | +8.40E-04 |
| FBXW11  | chr5:171273951-171274014  | - | +7.60E-03 | +3.70E-04 | +2.90E-01 | +3.20E-03 |
| ITSN1   | chr21:34117660-34117827   | + | +4.40E-03 | +4.40E-01 | -5.40E-01 | +7.00E-05 |
| FOXN3   | chr14:88726483-88726546   | - | +2.60E-03 | +1.30E-03 | -2.00E-05 | -4.30E-06 |
| GBA2    | chr9:35728228-35728371    | - | -1.50E-01 | +9.50E-03 | NA        | +3.90E-05 |
| RAPGEF2 | chr4:160491660-160491735  | + | -4.00E-05 | +2.30E-01 | -4.00E-02 | -6.20E-04 |
| 8-Sep   | chr5:132137513-132137803  | - | -1.70E-01 | -2.50E-03 | NA        | -5.80E-03 |
| GSTM4   | chr1:110015617-110015728  | + | +2.00E-03 | -2.00E-04 | +1.10E-02 | +1.70E-04 |
| MACF1   | chr1:39707805-39707874    | + | +2.50E-12 | +8.10E-02 | -9.00E-09 | -7.20E-03 |
| USP28   | chr11:113182420-113182516 | - | +1.60E-04 | +5.80E-02 | +3.00E-01 | +2.00E-03 |
| PAN3    | chr13:27669321-27669483   | + | +5.80E-02 | +8.90E-02 | -2.10E-03 | -3.80E-08 |
| EPB41L3 | chr18:5388019-5388142     | - | +9.10E-03 | +1.90E-01 | -4.10E-01 | +5.40E-05 |
| EGFL7   | chr9:138683878-138683994  | + | -3.30E-05 | +2.80E-03 | NA        | +6.20E-05 |
| HR      | chr8:22030332-22030497    | - | -2.40E-04 | +3.80E-01 | NA        | -9.90E-03 |
| KIF1A   | chr2:241345408-241345684  | - | -9.80E-05 | +1.90E-01 | NA        | -2.80E-03 |
| ZNF326  | chr1:90245758-90245897    | + | -9.80E-03 | -4.20E-01 | -9.80E-02 | -1.50E-04 |
| SNX15   | chr11:64556215-64556251   | + | +1.90E-03 | -3.30E-03 | +3.50E-01 | +1.10E-06 |
| SCAMP5  | chr15:73095986-73096143   | + | +9.60E-03 | -3.40E-01 | -2.30E-03 | +1.40E-08 |
| BPTF    | chr17:63355536-63355698   | + | -4.20E-03 | +6.60E-03 | -2.70E-07 | +7.40E-05 |
| SLC6A6  | chr3:14484599-14484724    | + | +1.70E-04 | -2.50E-06 | +2.00E-01 | +5.00E-04 |
| NCAM1   | chr11:112597227-112597257 | + | -3.70E-01 | +2.30E-03 | -3.40E-04 | -2.90E-05 |
| WDR7    | chr18:52595010-52595109   | + | -6.40E-06 | +5.40E-12 | -1.20E-01 | -9.70E-03 |
| RBM26   | chr13:78825288-78825360   | - | +3.70E-01 | +2.50E-01 | -7.20E-06 | -5.30E-04 |
| RBM12B  | chr8:94822032-94822100    | - | +7.20E-03 | NA        | +1.50E-01 | +3.00E-03 |
| CAMTA2  | chr17:4830210-4830305     | - | -7.10E-04 | NA        | +8.80E-02 | -3.40E-03 |
| COPS7A  | chr12:6707352-6707428     | + | -1.30E-01 | -1.70E-02 | -7.80E-03 | -4.90E-03 |
| FAM126B | chr2:201560332-201560500  | - | -1.10E-02 | +7.30E-04 | -1.70E-03 | +9.10E-06 |
| MXRA7   | chr17:72191523-72191604   | - | -1.70E-05 | +2.90E-04 | +1.30E-02 | +1.80E-05 |
| BFAR    | chr16:14656423-14656568   | + | +8.90E-05 | -2.40E-04 | -3.70E-03 | -7.20E-03 |

|                |                          |   |           |           |           |           |
|----------------|--------------------------|---|-----------|-----------|-----------|-----------|
| <b>NAE1</b>    | chr16:65418080-65418184  | - | -5.20E-07 | +2.60E-04 | NA        | +3.70E-03 |
| <b>CACNA1B</b> | chr9:140031411-140031474 | + | NA        | -3.40E-04 | +4.90E-03 | +1.50E-03 |
| <b>TNRC4</b>   | chr1:149946244-149946394 | - | +7.50E-03 | -3.60E-03 | -4.30E-03 | +2.00E-04 |
| <b>RCOR3</b>   | chr1:209544047-209544105 | + | +7.80E-03 | +7.10E-04 | -2.20E-03 | -1.60E-03 |

**Supplemental Table 6:** List of RT-PCR primers.

| Gene symbol        | Species    | Forward Primer        | Reverse Primer         | Skipping (bp) | Inclusion (bp) |
|--------------------|------------|-----------------------|------------------------|---------------|----------------|
| LMBR1/ACHP         | Human      | TCTGCTCTGCCTGTGATGTC  | GTGCTTTCTGATGCCCATTT   | 112           | 274            |
| LMBR1/ACHP         | Chimpanzee | TCTGCTCTGCCTGTGATGTC  | CGGTTGAAATGGAAATGCTT   | 210           | 372            |
| LMBR1/ACHP         | Rhesus     | TCTGCTCTGCCTGTGATGTC  | GAGCCAAGGTTGAAATGGAA   | 216           | 378            |
| ACSL3              | Human      | GACACAAGGGCGCATATCTT  | CAGGCTTTGCTTTAATTCGG   | 272           | 379            |
| ACSL3              | Chimpanzee | GACACAAGGGCGCATATCTT  | GCTTCATGGTAGATGGTTTTGA | 134           | 241            |
| ACSL3              | Rhesus     | CACAAGGGCGCGTATCTTTA  | GCTTCATGGTAGATGGTTTTGA | 129           | 236            |
| SYNRG/AP1GBP1      | Human      | CTGTGGAGTGTGCCTCTTGA  | ATTCAGGGAAGCGAACTGTG   | 277           | 313            |
| SYNRG/AP1GBP1      | Chimpanzee | GGCCTGGGATTAATAATGCT  | GGCTTTGGTTGACACAGTT    | 172           | 208            |
| SYNRG/AP1GBP1      | Rhesus     | CTGTGGAGTGTGCCTCTTGA  | ACTGATTGGTCCCTGTCACC   | 241           | 277            |
| ASRGL1             | Human      | GAAGACGATCCCGAGTTCAA  | GCCTTGGTCAGTCAGAAAGC   | 55            | 198            |
| ASRGL1             | Chimpanzee | GAAGACGATCCCGAGTTCAA  | GCCTTGGTCAGTCAGAAAGC   | 55            | 198            |
| ASRGL1             | Rhesus     | GAAGACGATCCCGAGTTCAA  | TTCTGAGCACCTTTTTCGTG   | 168           | 311            |
| C11orf80           | Human      | GCAAGGTTCCATCCAATTCA  | TGTGCAGTTTGGTCCCTGAAC  | 98            | 209            |
| C11orf80           | Chimpanzee | GCAAGGTTCCATCCAATTCA  | CACATGAGCAGTGGTGAAGAA  | 149           | 260            |
| CAPRIN2/C1QDC1     | Human      | ACTGACCTGCCCTGAAAGAA  | CTTTTCCTTGGCATTITTTGG  | 119           | 202            |
| CAPRIN2/C1QDC1     | Chimpanzee | GGGTTTGAATGGTGCAGTGT  | CTTTTCCTTGGCATTITTTGG  | 182           | 265            |
| CAPRIN2/C1QDC1     | Rhesus     | ACTGACCTGCCCTGAAAGAA  | CTTGGCATTITTTGGGAACTG  | 113           | 196            |
| CAMTA1             | Human      | ATAATGAGGTTTCTTCGCCG  | TCCTGGGTGTCTTGATTCC    | 352           | 383            |
| CAMTA1             | Chimpanzee | AGGTTTCTACGCCGCTGTC   | TGTGTGCGTGTGTTGTTGTT   | 157           | 188            |
| CAMTA1             | Rhesus     | AGGTTTCTACGCCGCTGTC   | ATTGCTAAGGGATGCTGCTG   | 86            | 117            |
| LPHN3/CIRL3        | Human      | ATCACTTGAATGCTGGGGAC  | TGTGGCTGAAGGAGGTTGTT   | 166           | 205            |
| LPHN3/CIRL3        | Chimpanzee | ACTTGAATGCTGGGGACATC  | TGTGGCTGAAGGAGGTTGTT   | 163           | 202            |
| LPHN3/CIRL3        | Rhesus     | ACTTGAATGCTGGGGACATC  | TGTGGCTGAAGGAGGTTGTT   | 163           | 202            |
| DDX42              | Human      | GACAGCGCTACTTTGGG     | TGCCAGGACCACCTTTATTC   | 121           | 192            |
| DDX42              | Chimpanzee | GGACAGCGCTACTTTGGG    | TGCCAGGACCACCTTTATTC   | 122           | 193            |
| DDX42              | Rhesus     | CTGGGACAGCGCTACTT     | AACCTCAAAGCCAAATCCT    | 152           | 223            |
| DCAF11/WDR23/GL014 | Human      | GCACAGCTTTCCTCGAATGT  | CAGTGAAGCCCAGATCATTG   | 57            | 122            |
| DCAF11/WDR23/GL014 | Chimpanzee | GGATGCTACCCCTGACACC   | CAGTGAAGCCCAGATCATTG   | 156           | 221            |
| DCAF11/WDR23/GL014 | Rhesus     | GGATGCTACCCCTGACACC   | CAGTGAAGCCCAGATCATTG   | 156           | 221            |
| GPBP1L1            | Human      | CCATTTTGGGAAGAGCTTTG  | TGAAAGGCCACACGAATCT    | 144           | 189            |
| GPBP1L1            | Chimpanzee | CCATTTTGGGAAGAGCTTTG  | GATCCATTTCCACCACTTCA   | 171           | 216            |
| GPBP1L1            | Rhesus     | CCATTTTGGGAAGAGCTTTG  | TCCATTTCCACCATTTCACA   | 169           | 214            |
| GSTM3              | Human      | TATGGTTCTCGGGTACTGGG  | AATTTACATCCAGCCATTG    | 71            | 147            |
| GSTM3              | Chimpanzee | GGAAGACCGTTACCATGTCCG | AATTTACATCCAGCCATTG    | 102           | 178            |
| GSTM3              | Rhesus     | TTGGGGTACTGGGATATTCG  | GGAAAGTCCAGGTCCAGCTT   | 85            | 161            |

|                                |            |                         |                        |     |     |
|--------------------------------|------------|-------------------------|------------------------|-----|-----|
| NUPL1/KIAA0410                 | Human      | CTTCTGTGGGGCTCAATTTT    | TAGAGCAAATGGTGTGGCAG   | 224 | 260 |
| NUPL1/KIAA0410                 | Chimpanzee | CTTCTGTGGGGCTCAATTTT    | AGATGTAGTGGCTGGCGTTC   | 158 | 194 |
| NUPL1/KIAA0410                 | Rhesus     | CTTCTGTGGGGCTCAATTTT    | AGATGTAGTGGCTGGCGTTC   | 158 | 194 |
| ERMP1/KIAA1815                 | Human      | TTGTGGTAAAGCTGGAACCC    | TTTCCCTCCTACACCTGCTG   | 171 | 299 |
| ERMP1/KIAA1815                 | Chimpanzee | CCCACAGGCTCTTTTAGCAT    | TTTCCCTCCTACACCTGCTG   | 238 | 366 |
| ERMP1/KIAA1815                 | Rhesus     | CCCACAGGCTCTTTTAGCAT    | TTTCCCTCCTACACCTGCTG   | 238 | 366 |
| MACF1                          | Human      | TTTGGGGATTCTCAGCAGTT    | GGGAAGATGGTTTGGACCTT   | 229 | 298 |
| MACF1                          | Chimpanzee | TTTGGGGATTCTCAGCAGTT    | GGGAAGATGGTTTGGACCTT   | 229 | 298 |
| MACF1                          | Rhesus     | TTTGGGGATTCTCAGCAGTT    | CCCCCTCTGGTAGGATGAAT   | 172 | 241 |
| MAGOH                          | Human      | TGCCAACACAGCAATTACA     | TGTGTTTCATCTCCAATGACGA | 77  | 188 |
| MAGOH                          | Chimpanzee | GCCAACACAGCAATTACAAG    | TGACATCAATAAGGGAACCA   | 118 | 229 |
| MAGOH                          | Rhesus     | TGCCAACACAGCAATTACA     | TGTGTTTCATCTCCAATGACGA | 77  | 188 |
| PCCB                           | Human      | TGTCCTGGCTTTCTACCTG     | TCATAGGCACCTCCATAGGC   | 40  | 141 |
| PCCB                           | Chimpanzee | GGGCTCGTTTTGTCAGATTC    | CTTTGCTCCCATGACTGC     | 177 | 278 |
| PCCB                           | Rhesus     | GGGCTCGTTTTGTCAGATTC    | TCATAGGCACCTCCATAGGC   | 98  | 199 |
| PIGX-chr3[197937922:197938039] | Human      | AGTGAAGTTTGGGGAAAGCA    | GACCACAATCGAGGCTTCTC   | 307 | 424 |
| PIGX-chr3[197937922:197938039] | Chimpanzee | GATCCGTATGAGTTGGCTTCA   | CGAGGCTTCTCCATCTTAC    | 216 | 333 |
| PIGX-chr3[197937922:197938039] | Rhesus     | TGAGTTGGCTTCATTACGAGAG  | ATCGAGGTTTCTCCATCGTG   | 210 | 327 |
| PIGX-chr3[197939969:197940023] | Human      | GTGAAGATGGAGAAGCCTCG    | TCTGAGTGAGCCCAGCATTT   | 97  | 151 |
| PIGX-chr3[197939969:197940023] | Chimpanzee | TGCCAGACGAGATTCACAGT    | CTTCTGAGTGAGCCCAGCAT   | 175 | 229 |
| PTPRZ1                         | Human      | AATGCACTCCTCATTCTGG     | TCGATTCTTTCCCTGTTGC    | 132 | 249 |
| PTPRZ1                         | Chimpanzee | GAAACTGAGGTGCTGGACAGT   | TCGATTCTTTCCCTGTTGC    | 171 | 288 |
| PTPRZ1                         | Rhesus     | GAAACTGAGGTGCTGGACAGT   | TCGATTCTTTCCCTGTTGC    | 171 | 288 |
| SIPA1L1/DKFZp686G1344          | Human      | GGCAGAACACCCAGTCAGAT    | ATGCCCTTGTTTGGTGGAG    | 206 | 269 |
| SIPA1L1/DKFZp686G1344          | Chimpanzee | GGCAGAACACCCAGTCAGAT    | ATGCCCTTGTTTGGTGGAG    | 206 | 269 |
| SIPA1L1/DKFZp686G1344          | Rhesus     | TTGGAGTGAGCCGTAGATCC    | ATGCCCTTGTTTGGTGGAG    | 242 | 305 |
| SOS1                           | Human      | GATCATTCGAGCCCTTTTCA    | GGGACAGGCACCTTCATCAGT  | 83  | 128 |
| SOS1                           | Chimpanzee | CATCTGCACCAAATTCTCCA    | GGGACAGGCACCTTCATCAGT  | 175 | 220 |
| SOS1                           | Rhesus     | GATCATTCGAGCCCTTTTCA    | GGGACAGGCACCTTCATCAGT  | 83  | 128 |
| ZDHHHC13/HIP14L                | Human      | CAGCAGGAAGTGGGAGAAGA    | TAGCAGCCCAATGAAGAAGC   | 224 | 370 |
| ZDHHHC13/HIP14L                | Chimpanzee | CAGCAGGAAGTGGGAGAAGA    | TAGCAGCCCAATGAAGAAGC   | 224 | 370 |
| ZDHHHC13/HIP14L                | Rhesus     | CAGCAGGAAGTGGGAGAAGA    | AGCAGCCCAATGAAGAAGTG   | 223 | 369 |
| ZFAND1                         | Human      | TGTGTGTGATGATTGTTTCAGGA | GCCACAAGTTCTCTCTCAGCA  | 119 | 159 |
| ZFAND1                         | Chimpanzee | TGTGTGTGATGATTGTTTCAGGA | GCCACAAGTTCTCTCTCAGCA  | 119 | 159 |

|                                    |                                                        |                            |                           |                      |                       |
|------------------------------------|--------------------------------------------------------|----------------------------|---------------------------|----------------------|-----------------------|
| ZFAND1                             | Rhesus                                                 | TCTTCCGTTTGTGTGTGATGA      | TTGAATGAGCATGGGTAAGATG    | 101                  | 141                   |
| ZNF207                             | Human                                                  | CCAGGTGTTCTCCTCTGAT        | GGTCCAGGTGGCATCATT        | 95                   | 143                   |
| ZNF207                             | Chimpanzee                                             | TGCCAGGTGTTCTCCT           | CAGGCATCAGAGGTGGTATT      | 120                  | 168                   |
| ZNF207                             | Rhesus                                                 | CCAGGTGTTCTCCTCTGAT        | GGTCCAGGTGGCATCATT        | 95                   | 143                   |
|                                    |                                                        |                            |                           |                      |                       |
| <b>Fluorescent labeling RT-PCR</b> | <b>GFPN tag sequence: 5'-CGTCGCCGTCCAGCTCGACCAG-3'</b> |                            |                           |                      |                       |
| <b>Gene symbol</b>                 | <b>Species</b>                                         | <b>Forward Primer</b>      | <b>Reverse Primer</b>     | <b>Skipping (bp)</b> | <b>Inclusion (bp)</b> |
| AMOTL1                             | Human                                                  | GFPN-GTGAATGGGGTTGATTGTCC  | AGTTCATGTTCTCGGTTGGG      | 293                  | 443                   |
| AMOTL1                             | Chimpanzee                                             | GFPN-GTGAATGGGGTTGATTGTCC  | CTCAGGAAGTTTGGGGAGTG      | 207                  | 357                   |
| AMOTL1                             | Rhesus                                                 | GFPN-GTGAATGGGGTTGATTGTCC  | CTCAGGAAGTTTGGGGAGTG      | 207                  | 357                   |
| DCLK1 (DCAMKL1)                    | Human                                                  | GFPN-ATGATGGCCTCCAGAAAAT   | CTTGTACCGGCTCCTCACAT      | 185                  | 259                   |
| DCLK1 (DCAMKL1)                    | Chimpanzee                                             | GFPN-ATGATGGCCTCCAGAAAAT   | CTTGTACCGGCTCCTCACAT      | 185                  | 259                   |
| DCLK1 (DCAMKL1)                    | Rhesus                                                 | GFPN-ATGATGGCCTCCAGAAAAT   | CTTGTACCGGCTCCTCACAT      | 185                  | 259                   |
| EGFL7                              | Human                                                  | GFPN-GTGTACCAGCCCTTCTCAC   | GACACAGCTCCCTCCGTTT       | 97                   | 213                   |
| EGFL7                              | Chimpanzee                                             | GFPN-TGCTGTCCGGGCTCA       | TGTCACCCTGCCATCCT         | 189                  | 305                   |
| EGFL7                              | Rhesus                                                 | GFPN-GTGTACCAGCCCTTCTCAC   | ATGCAGCTTCTCCGTTT         | 96                   | 212                   |
| FMR1/FMRP                          | Human                                                  | GFPN-TCAAGGGTTGGACCTAATGC  | AGCGATGCTGTCTTTGTTT       | 171                  | 234                   |
| FMR1/FMRP                          | Chimpanzee                                             | GFPN-TCAAGGGTTGGACCTAATGC  | AGCGATGCTGTCTTTGTTT       | 144                  | 207                   |
| FMR1/FMRP                          | Rhesus                                                 | GFPN-TCAAGGGTTGGACCTAATGC  | AGCGATGCTGTCTTTGTTT       | 144                  | 207                   |
| KCNJ3/GIRK1                        | Human                                                  | GFPN-GGACGGAAAACCTCACGCTTA | TGGTGCTATTAAGGGGACG       | 291                  | 508                   |
| KCNJ3/GIRK1                        | Chimpanzee                                             | GFPN-GGACGGAAAACCTCACGCTTA | GGGACTTCAAATGTTGCAT       | 225                  | 442                   |
| KCNJ3/GIRK1                        | Rhesus                                                 | GFPN-GGACGGAAAACCTCACGCTTA | GGGACTTCAAATGTTGCAT       | 225                  | 442                   |
| GLS                                | Human                                                  | GFPN-ATGGAACAGCGGGACTATGA  | ACGGTTTGATTTTCTTCCC       | 184                  | 248                   |
| GLS                                | Chimpanzee                                             | GFPN-ATGGAACAGCGGGACTATGA  | ATGGTGTCCAAAGTGCAGTG      | 101                  | 165                   |
| GLS                                | Rhesus                                                 | GFPN-ATGGAACAGCGGGACTATGA  | TGGACGGTTTGATTTTCTT       | 187                  | 251                   |
| MBD1                               | Human                                                  | GAAATGTGTCCAGCGACGTT       | GFPN-CCATCTTGGAGTCACAGCCT | 71                   | 146                   |
| MBD1                               | Chimpanzee                                             | AGCCGAGGGTGTGGAGTAT        | GFPN-AGCCATCTTGGAGTCACAGC | 174                  | 249                   |
| MBD1                               | Rhesus                                                 | AGCCGAGGGTGTGGAGTAT        | GFPN-AGCCATCTTGGAGTCACAGC | 174                  | 249                   |
| NAV2                               | Human                                                  | TTCTTCAGCCTCTCCCATA        | GFPN-TGCGTCGGTTGTTAGCAGTA | 307                  | 376                   |
| NAV2                               | Chimpanzee                                             | GAAGCAGCACCTCTCCTCAC       | GFPN-GATACCCTCGCGGTAGGAC  | 204                  | 273                   |
| NAV2                               | Rhesus                                                 | GAAGCAGCACCTCTCCTCAC       | GFPN-GATACCCTCGCGGTAGGAC  | 204                  | 273                   |

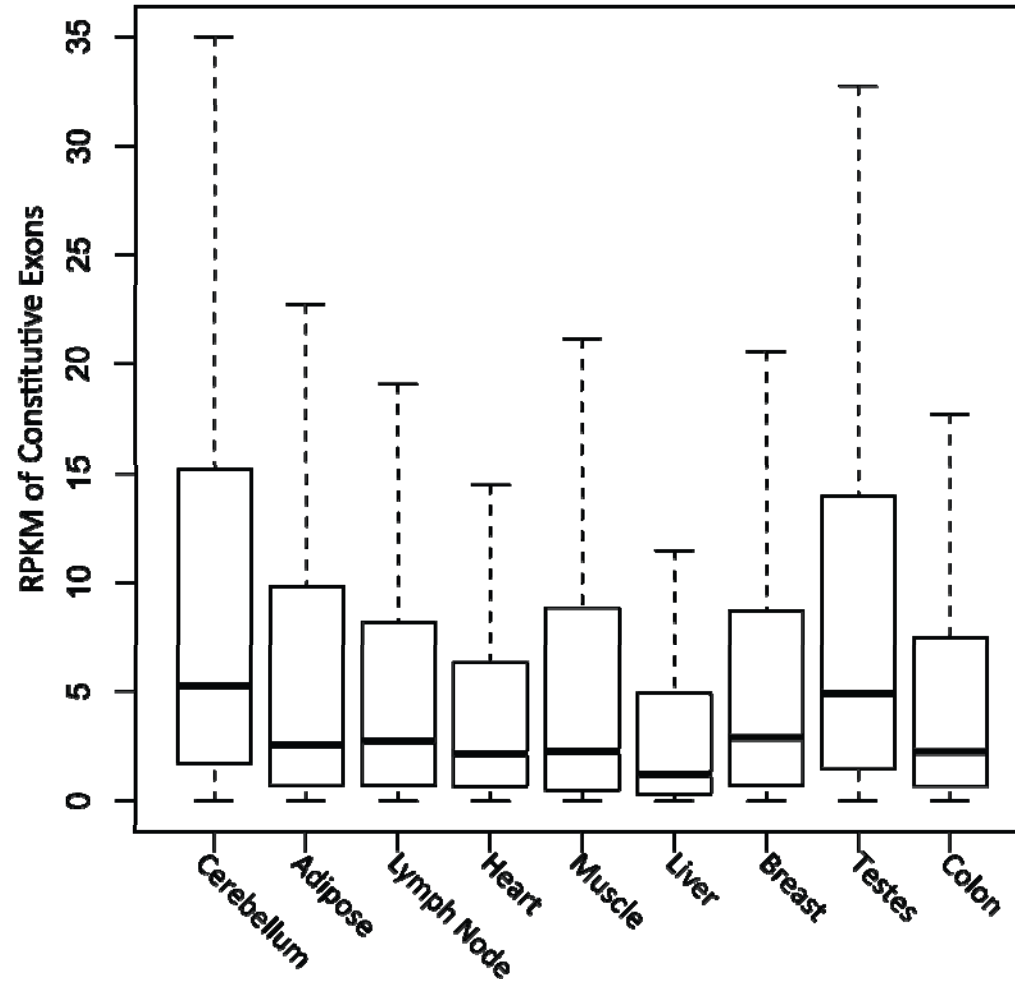

Supplemental Figure 1

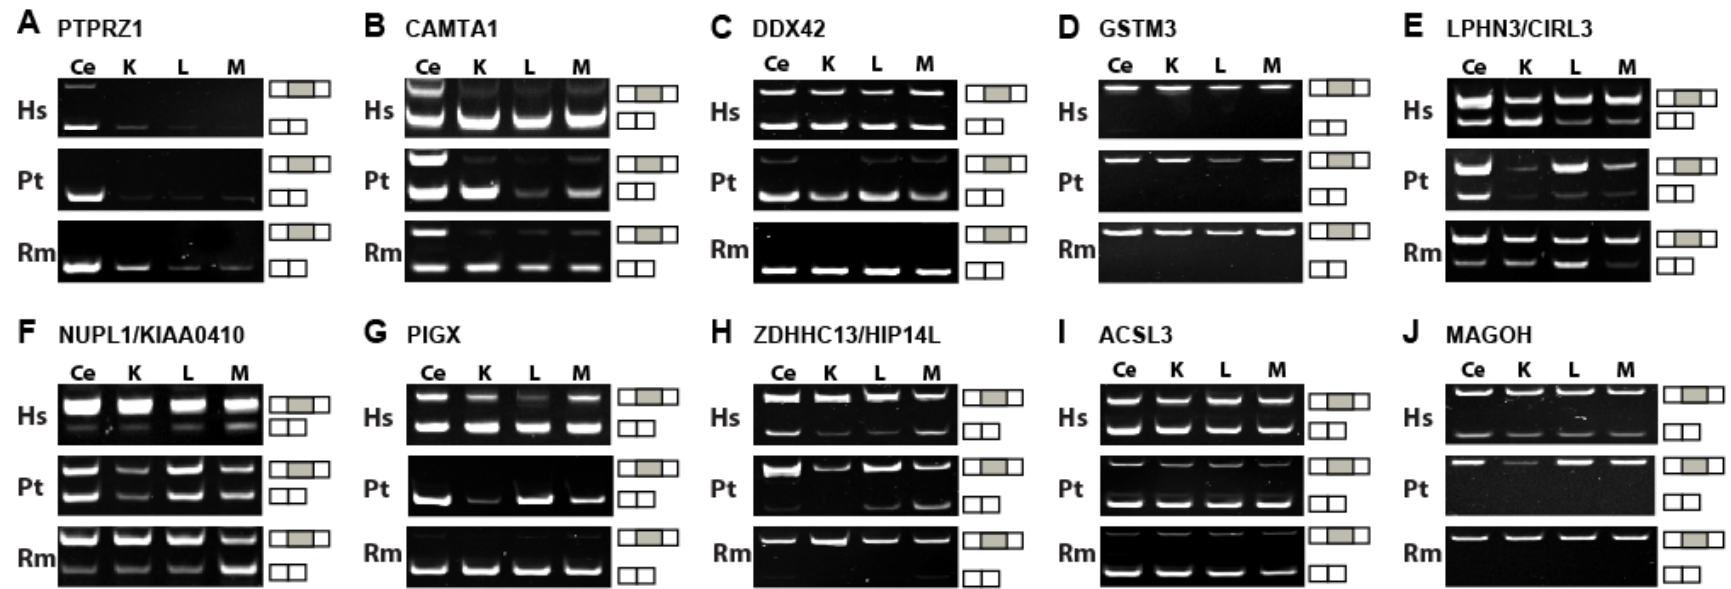

Supplemental Figure 2
